# Supplementary material for: A comprehensive investigation of the condensation of furanic platform molecules to C14–C15 fuel precursors over sulfonic acid functionalized silica supports
Source: Royal Society of Chemistry journal article supplement (doi:10.1039/c8gc01953c), 2018-01-01
Supplement: c8gc01953c1.pdf [file c8gc01953c1.pdf]

# Supporting Information

## **A comprehensive investigation of condensation of furanic platform molecules to diesel precursors over sulfonic acid functionalized silica supports**

Mahlet N. Gebresillase<sup>1</sup>, Raghavendra Shavi, Jeong Gil Seo\*

Department of Energy Science Technology, Myongji University, Myongji-ro 116, Nam-dong, Cheoin-gu, Yongin-si, Gyeonggi-do 449-728, South Korea

\*Corresponding author.

E-mail address: jgseo@mju.ac.kr (J.G. Seo)

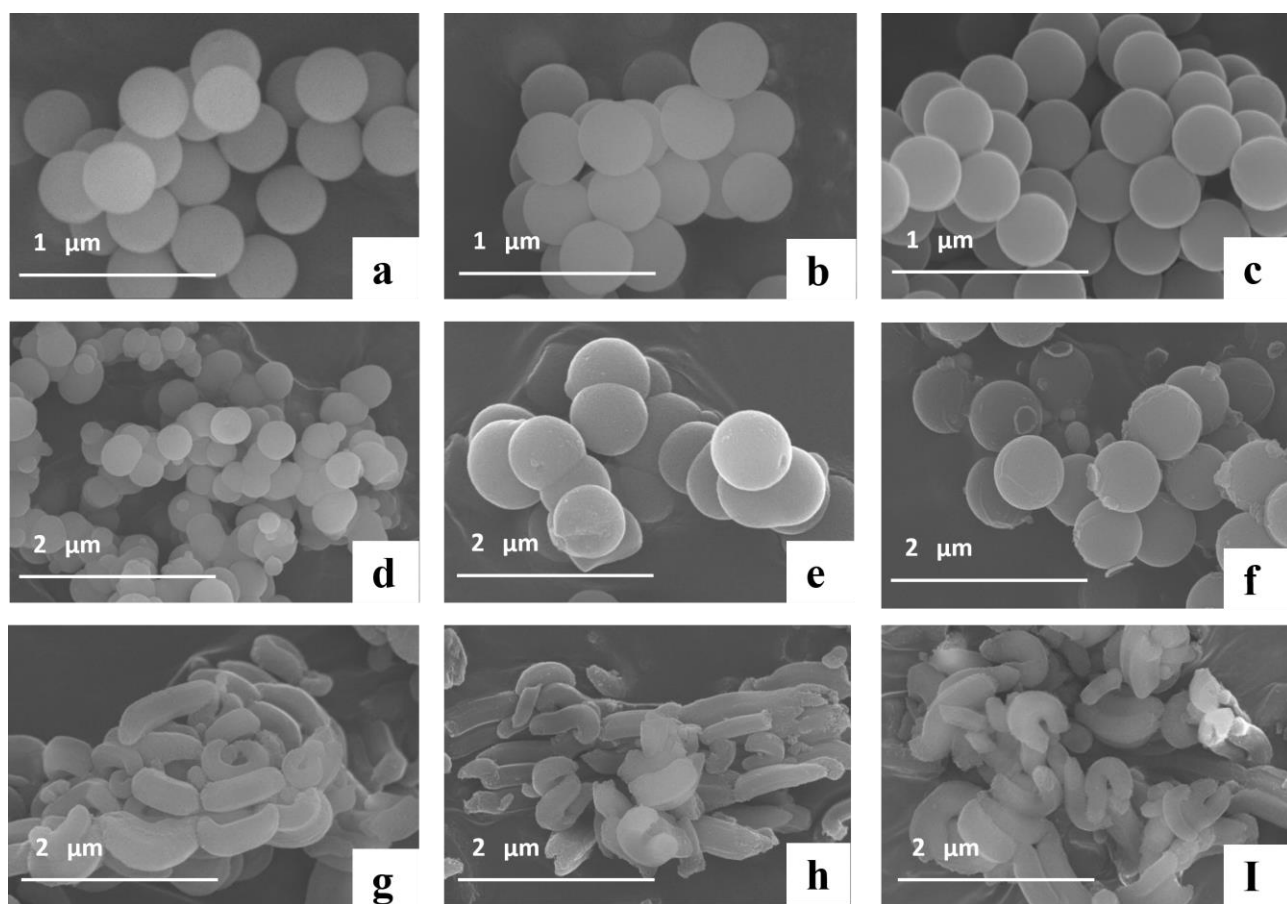

**Figure S1:** SEM images of NP (a),  $\text{NPSO}_3\text{H}$  (b),  $\text{NPAPSO}_3\text{H}$  (c), MCM-41 (d),  $\text{MCM-41SO}_3\text{H}$  (e),  $\text{MCM-41APSO}_3\text{H}$  (f), SBA-15 (g),  $\text{SBA-15SO}_3\text{H}$  (h), and  $\text{SBA-15APSO}_3\text{H}$  (i).

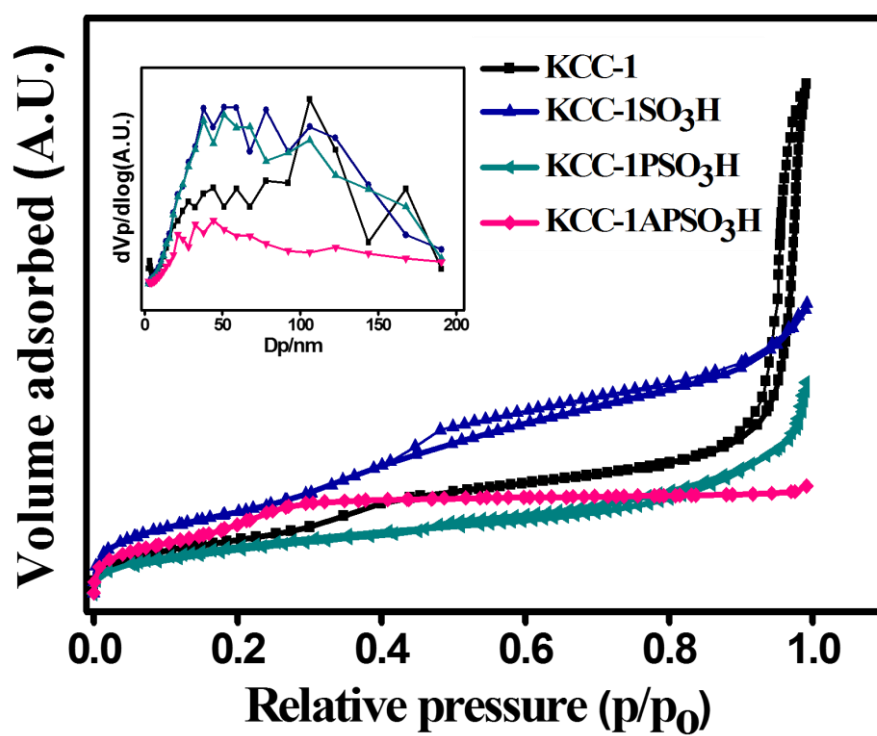

**Figure S2:** N<sub>2</sub> Adsorption-desorption isotherms (pore size distribution in inset) of KCC-1, KCC-1SO<sub>3</sub>H, KCC-1 PSO<sub>3</sub>H and KCC-1APSO<sub>3</sub>H.

In the FT-IR spectra of KCC-1, KCC-1SO<sub>3</sub>H, KCC-1PSO<sub>3</sub>H, and KCC-1APSO<sub>3</sub>H, the asymmetric Si—O—Si stretching from 1,200 to 1,000 cm<sup>-1</sup> and OH stretch from 3,600 to 3,000 cm<sup>-1</sup> showed broad absorption band. The two peaks at 880 cm<sup>-1</sup> and 450 cm<sup>-1</sup> are contributed by the symmetric stretching of Si—O—Si and Si—O—Si bending, respectively. As for the sulfuric acid functional groups only, the FT-IR absorption range of the O=S=O asymmetric and symmetric stretching peaks lay around 1110 and 1250 cm<sup>-1</sup>, respectively, overlapping with the broad stretching band of Si—O—Si. The S—O stretching mode lies about 574 cm<sup>-1</sup>, and the O—Si—O bending from KCC-1APSO<sub>3</sub>H lies about 460 cm<sup>-1</sup>. The catalysts KCC-1PSO<sub>3</sub>H, and KCC-1APSO<sub>3</sub>H show characteristic peaks for the stretching vibrations of aliphatic C—H bonds around 2960 cm<sup>-1</sup> and S—C stretching around 600 cm<sup>-1</sup>. The peak at 1650 cm<sup>-1</sup> represents the water.

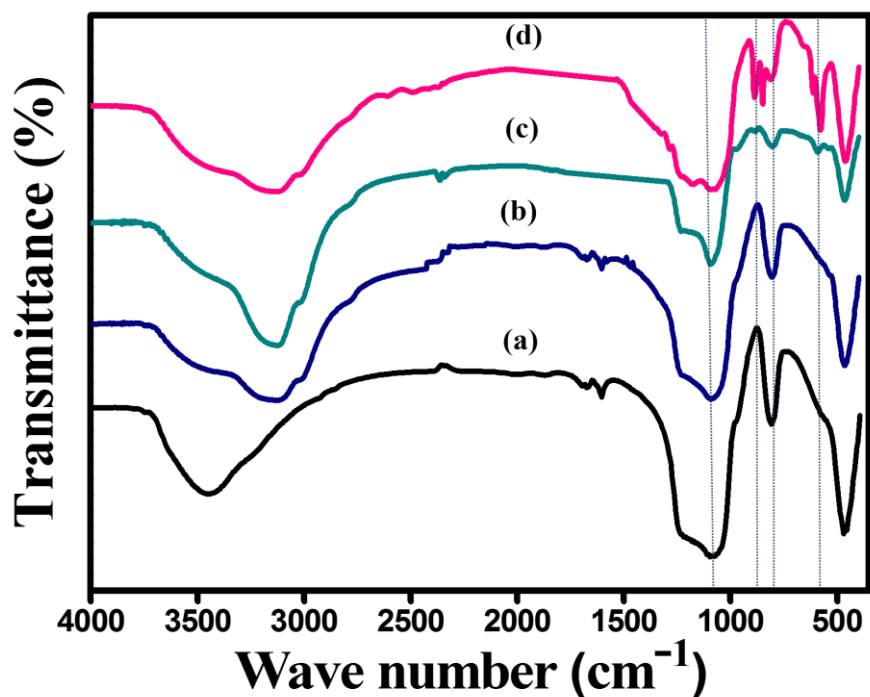

**Figure S3:** FTIR spectra of KCC-1 (a), KCC-1SO<sub>3</sub>H (b), KCC-1PSO<sub>3</sub>H (c) and KCC-1APSO<sub>3</sub>H (d).

Only a negligible weight loss of 2.4% is detected. The TGA plot of all the catalysts supported on KCC-1 confirm the incorporation of organic functionality in the silica framework. The sharp weight loss below 150 °C corresponds to the surface physisorbed water. The additional weight loss between the temperatures 150-450 °C can be attributed to the loss of organic functionality. The weight loss increase from KCC-1SO<sub>3</sub>H to KCC-1APSO<sub>3</sub>H indicates the presence of additional organic moieties (alkyl chain).

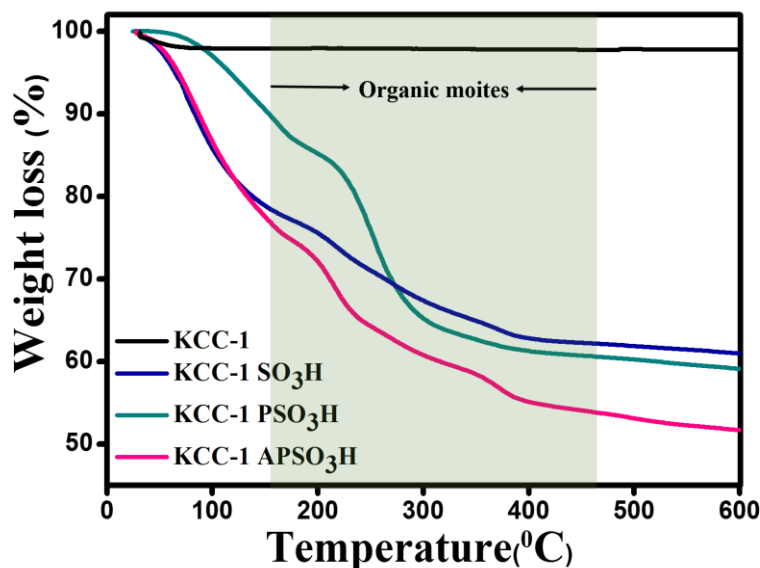

**Figure S4:** TGA diagram of KCC-1, KCC-1SO<sub>3</sub>H, KCC-1PSO<sub>3</sub>H and KCC-

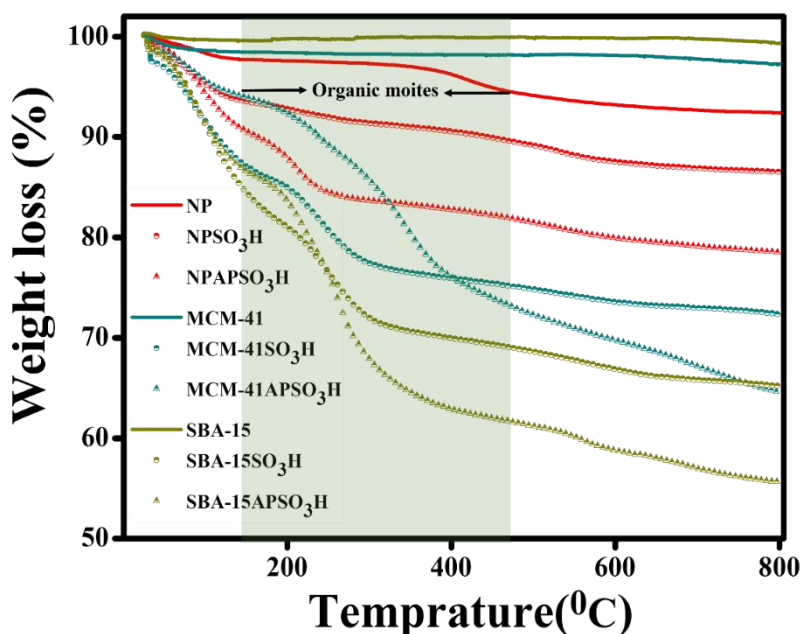

**Figure S5:** TGA diagram of NP, NPSO<sub>3</sub>H, NPAPSO<sub>3</sub>H, MCM-41, MCM-41SO<sub>3</sub>H, MCM-41, APSO<sub>3</sub>H, SBA-15, SBA-15SO<sub>3</sub>H, and SBA-15APSO<sub>3</sub>H.

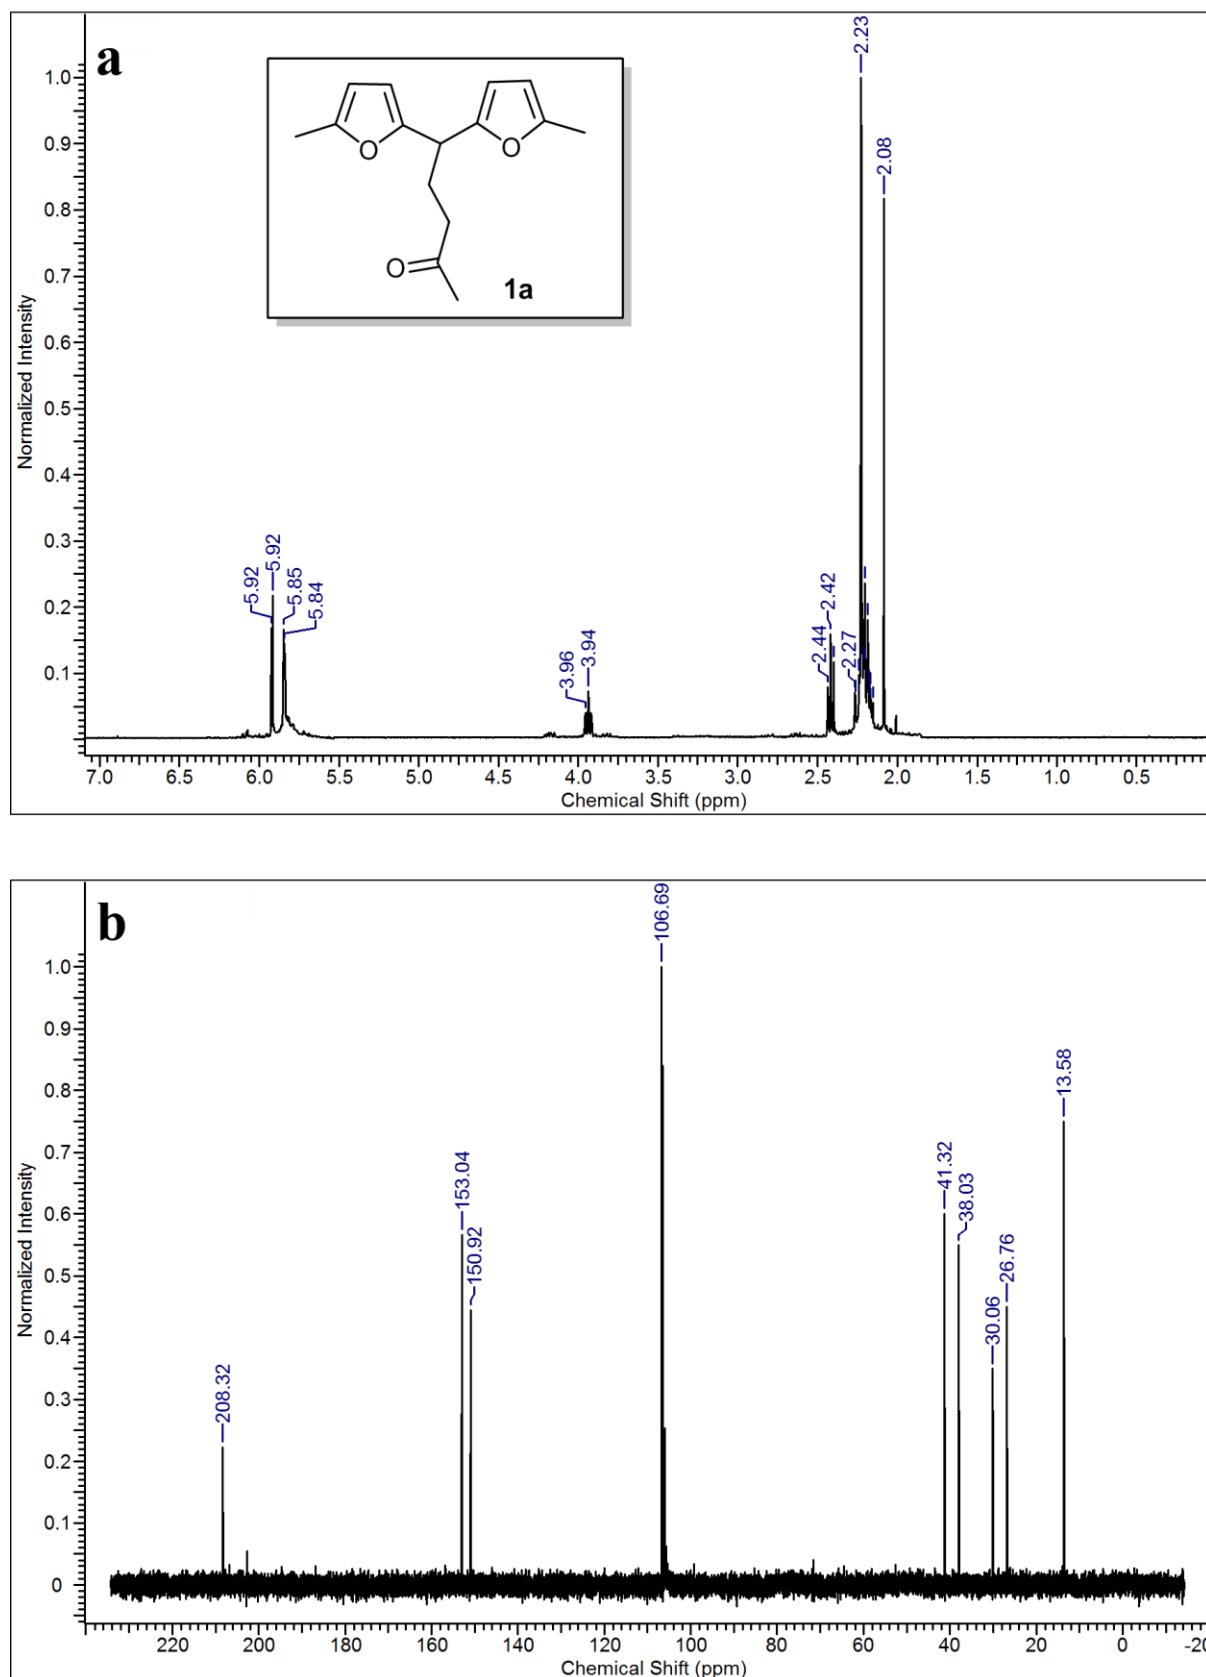

**Figure S6:**  $^1\text{H}$  and  $^{13}\text{C}$  NMR spectra of the 1a produced by the self-condensation of 2-MF.

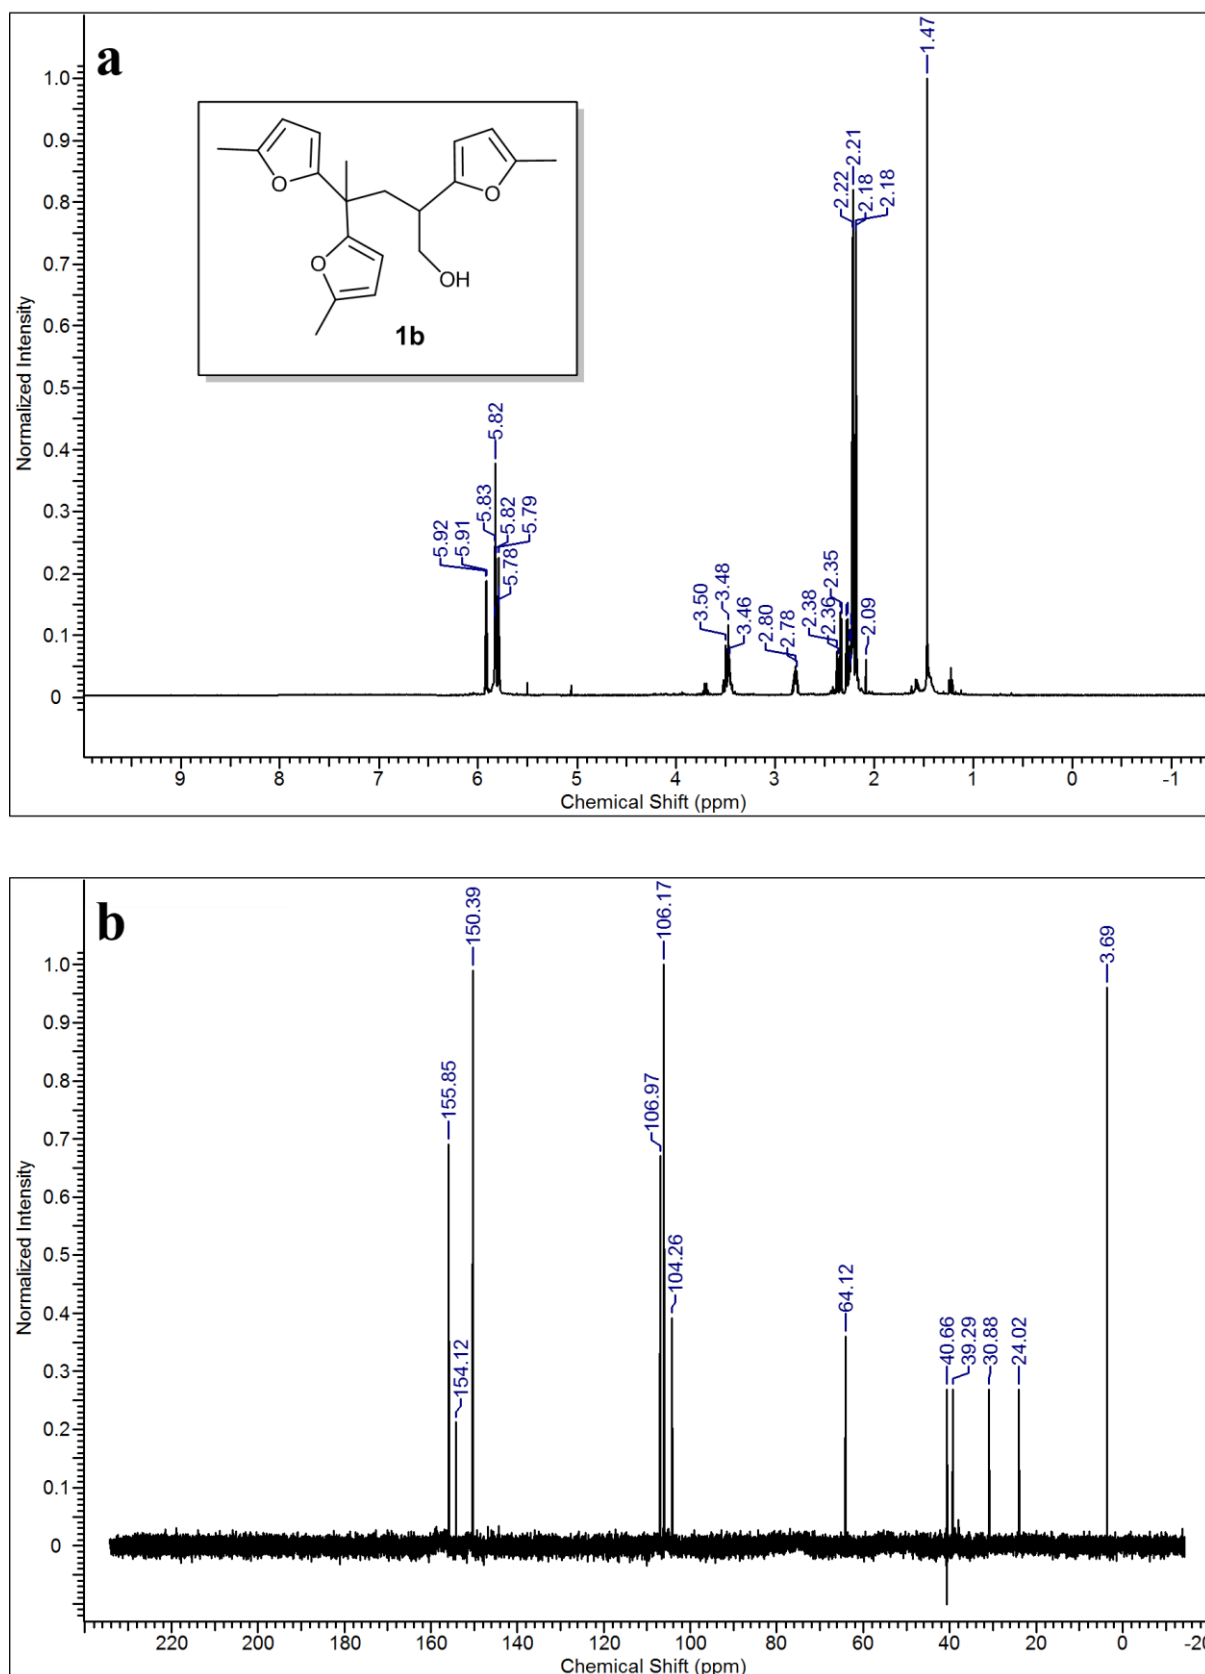

**Figure S7:**  $^1\text{H}$  and  $^{13}\text{C}$  spectra NMR of the **1b** produced by the self-condensation of 2-MF.

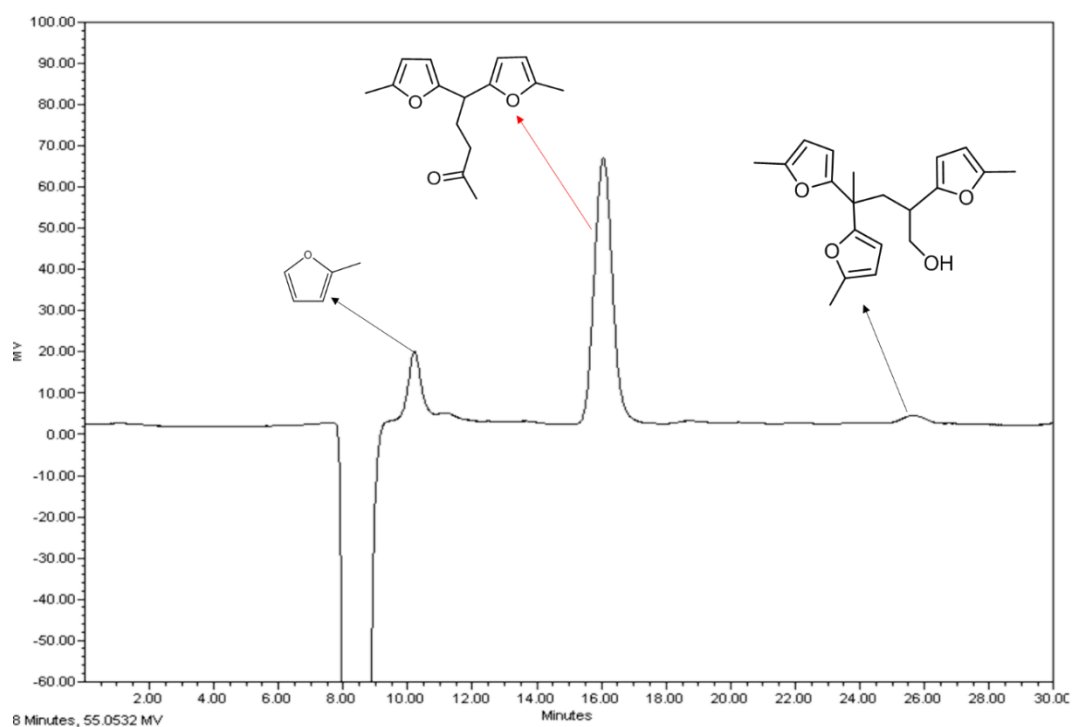

**Figure S8:** HPLC chromatogram of the liquid products from the self-condensation of 2-MF.

**Table S1:** Elemental Analysis data of the KCC-1 based catalysts

|                               | <b>C(wt%)</b> | <b>H(wt%)</b> | <b>S(wt%)</b> |
|-------------------------------|---------------|---------------|---------------|
| <b>KCC-1SO<sub>3</sub>H</b>   | 0.1518        | 0.9712        | 3.8219        |
| <b>KCC-1PSO<sub>3</sub>H</b>  | 1.1675        | 1.2449        | 2.8694        |
| <b>KCC-1APSO<sub>3</sub>H</b> | 1.6902        | 1.8851        | 5.5207        |

**a.**

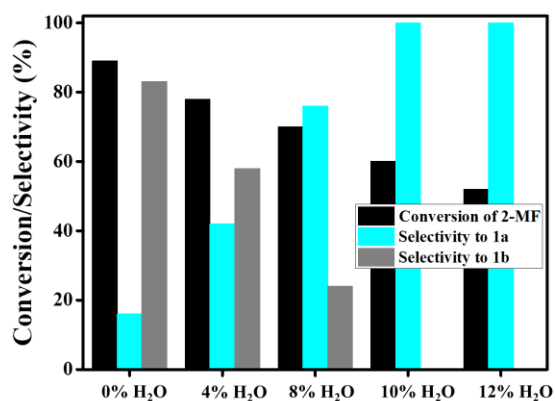

**b.**

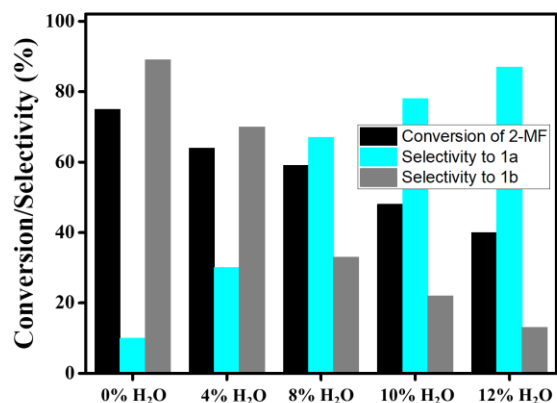

**c.**

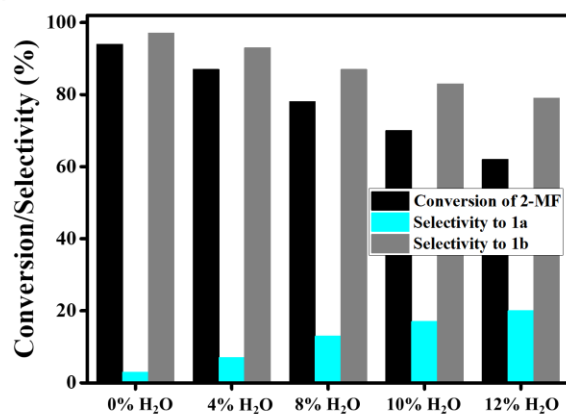

**Figure S9:** The effect of water on conversion of 2-MF and selectivity to 1a and 1b over a. KCC-1SO<sub>3</sub>H b. Amberlyst-15 and c. Nafion-212.

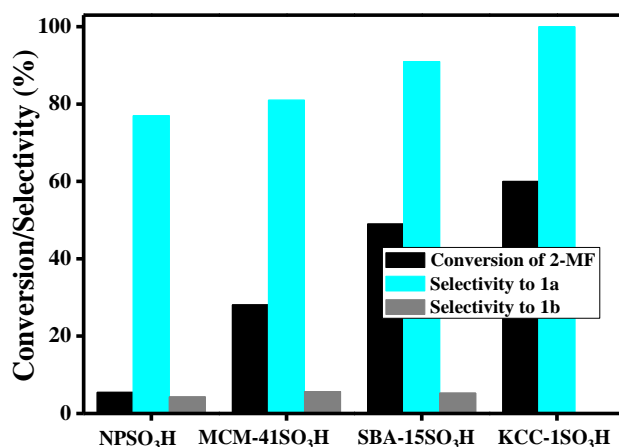

**Figure S10:** The effect of support morphology on conversion and selectivity. 2-MF (10 g) and catalyst (3 wt %) were condensed with an addition of water (10 wt %) at 85 °C for 48 h.

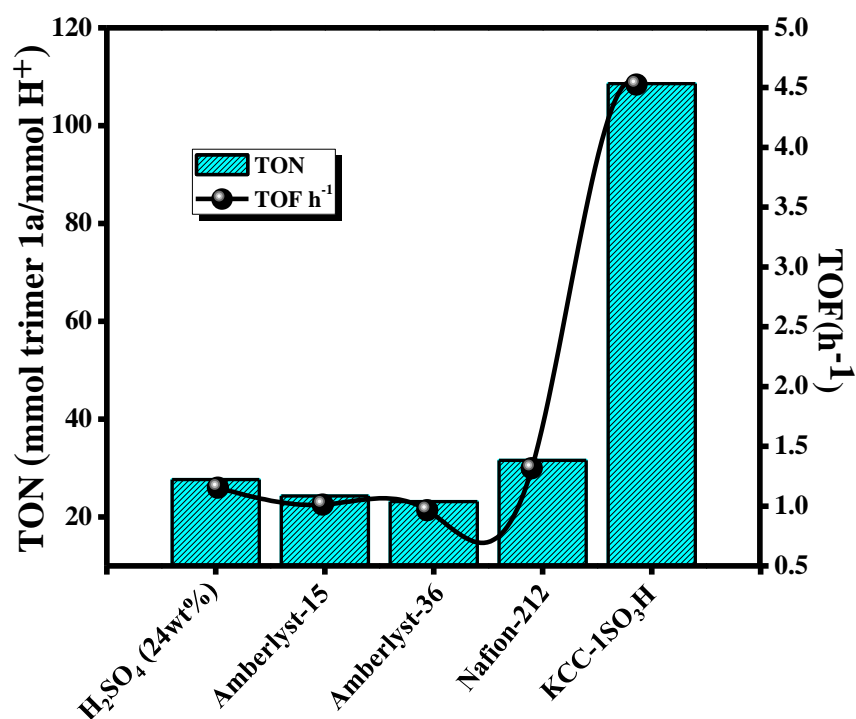

**Figure S11:** TON and TOF calculated from the yield after 24h reaction. 2-MF (10 g) and catalyst (3 wt%) were condensed with an addition of water (10 wt%) at 85 °C.

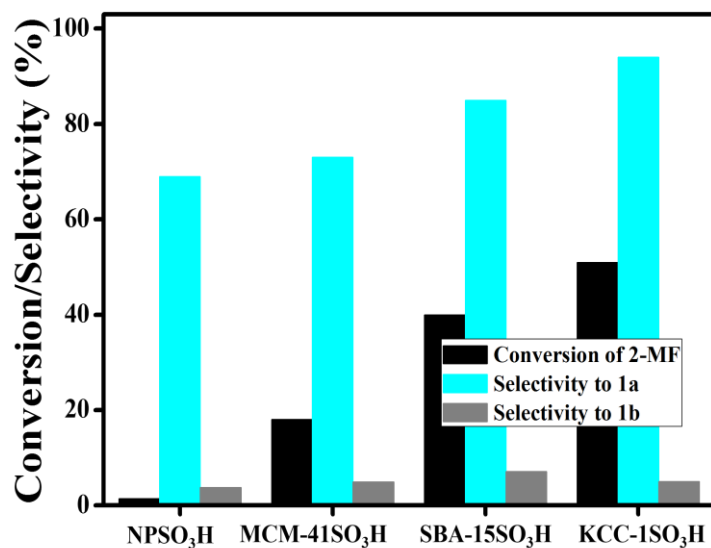

**Figure S12:** Self-condensation of 2-MF using recycled NP, MCM-41, SBA-15 and KCC-1 supported catalysts (reaction time = 48 h). 2-MF (10 g) and catalyst (3 wt%) were condensed with an addition of water (10 wt%) at 85°C.

**Table S2:** Physicochemical properties of the recycled catalysts

| Catalyst                                                                              | <sup>a</sup> S <sub>BET</sub> (m <sup>2</sup> g <sup>-1</sup> ) | % Change in S <sub>BET</sub> | <sup>a</sup> V <sub>total</sub> (cm <sup>3</sup> g <sup>-1</sup> ) | % Change in V <sub>total</sub> (cm <sup>3</sup> g <sup>-1</sup> ) | <sup>b</sup> Acidic amount (mmolg <sup>-1</sup> ) |
|---------------------------------------------------------------------------------------|-----------------------------------------------------------------|------------------------------|--------------------------------------------------------------------|-------------------------------------------------------------------|---------------------------------------------------|
| <b>Recycled catalyst from the Self-condensation reaction</b>                          |                                                                 |                              |                                                                    |                                                                   |                                                   |
| RNPSO <sub>3</sub> H                                                                  | 2.4                                                             | 84.8                         | 0.03                                                               | 26.8                                                              | 0.2                                               |
| RMCM-41SO <sub>3</sub> H                                                              | 187                                                             | 56.8                         | 0.10                                                               | 60.7                                                              | 0.45                                              |
| RSBA-15SO <sub>3</sub> H                                                              | 205                                                             | 53.4                         | 0.13                                                               | 66.7                                                              | 0.78                                              |
| RKCC-1SO <sub>3</sub> H                                                               | 243                                                             | 36.8                         | 0.71                                                               | 39.3                                                              | 1.01                                              |
| <b>Recycled catalyst from the Cross-condensation reaction of 2-MF and FUR</b>         |                                                                 |                              |                                                                    |                                                                   |                                                   |
| RNPAPSO <sub>3</sub> H                                                                | 4.1                                                             | 50                           | 0.01                                                               | 34.6                                                              | 0.10                                              |
| RMCM-41APSO <sub>3</sub> H                                                            | 163                                                             | 20                           | 0.13                                                               | 47.3                                                              | 0.47                                              |
| RSBA-15APSO <sub>3</sub> H                                                            | 178                                                             | 16.8                         | 0.19                                                               | 34.4                                                              | 0.76                                              |
| RKCC-1APSO <sub>3</sub> H                                                             | 206                                                             | 8.4                          | 0.75                                                               | 7.4                                                               | 0.99                                              |
| <b>Recycled catalyst from the Cross-condensation reaction of 2-MF and n-butanal</b>   |                                                                 |                              |                                                                    |                                                                   |                                                   |
| RNPAPSO <sub>3</sub> H                                                                | 4.2                                                             | 48.7                         | 0.01                                                               | 38.4                                                              | 0.11                                              |
| RMCM-41APSO <sub>3</sub> H                                                            | 161                                                             | 21.0                         | 0.11                                                               | 52.6                                                              | 0.74                                              |
| RSBA-15APSO <sub>3</sub> H                                                            | 176                                                             | 17.7                         | 0.17                                                               | 41.3                                                              | 0.45                                              |
| RKCC-1APSO <sub>3</sub> H                                                             | 209                                                             | 7.1                          | 0.73                                                               | 9.8                                                               | 0.97                                              |
| <b>Recycled catalyst from the Cross-condensation reaction of 2-MF and 2-pentanone</b> |                                                                 |                              |                                                                    |                                                                   |                                                   |
| RNPAPSO <sub>3</sub> H                                                                | 3.7                                                             | 54.8                         | 0.01                                                               | 46.1                                                              | 0.09                                              |
| RMCM-41APSO <sub>3</sub> H                                                            | 124                                                             | 37.2                         | 0.11                                                               | 63.1                                                              | 0.41                                              |
| RSBA-15APSO <sub>3</sub> H                                                            | 148                                                             | 30.8                         | 0.14                                                               | 51.7                                                              | 0.68                                              |
| RKCC-1APSO <sub>3</sub> H                                                             | 207                                                             | 8                            | 0.71                                                               | 12.3                                                              | 0.91                                              |

<sup>a</sup> As measured by BET

<sup>b</sup> From titration

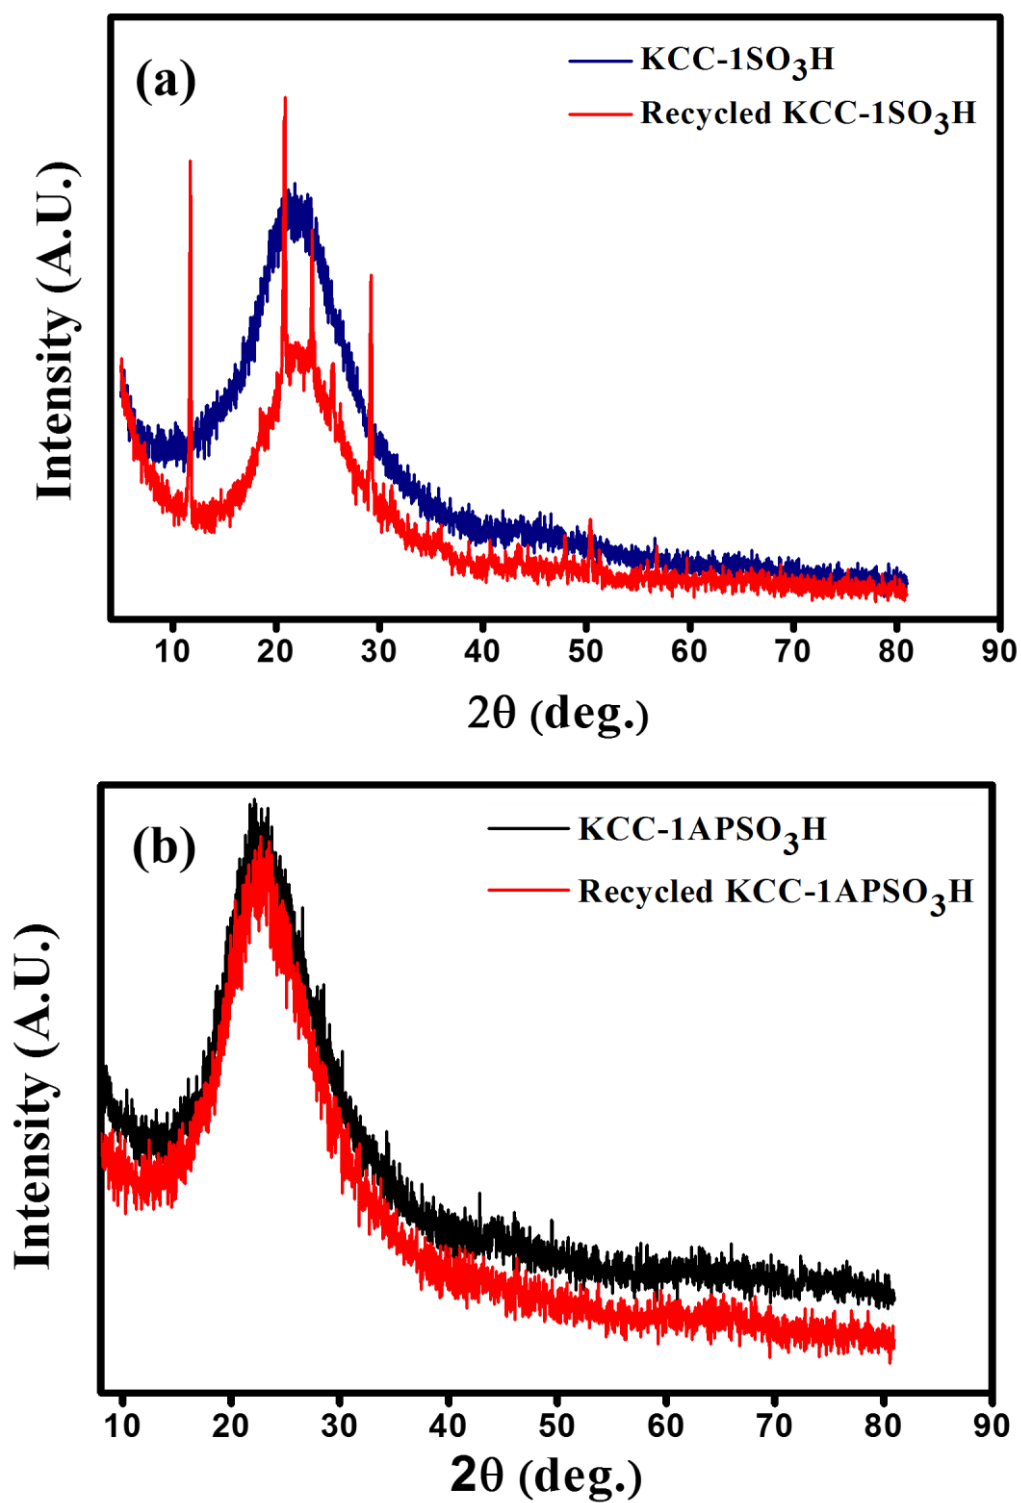

**Figure S13:** XRD spectrum of fresh and recycled KCC-1SO<sub>3</sub>H from the self-condensation reaction (a) and KCC-1APSO<sub>3</sub>H from the cross-condensation of 2-MF and FUR (b).

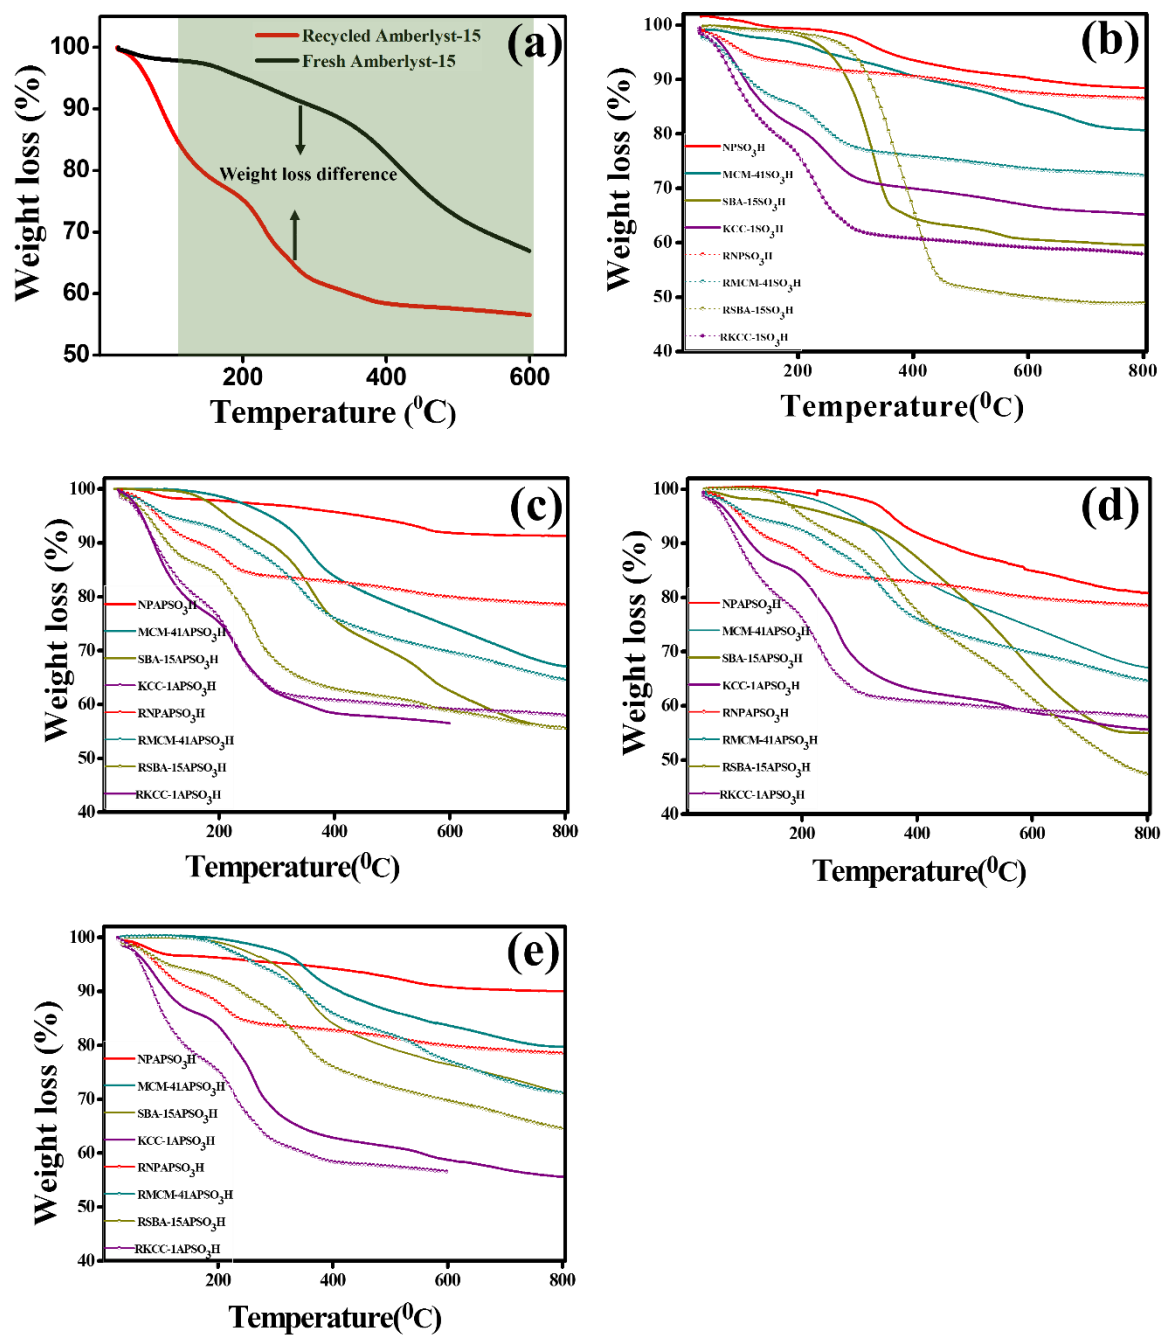

**Figure S14:** TGA diagram of fresh and recycled Amberlyst-15 from self-condensation of 2-MF (a), recycled silica supported catalysts from self-condensation of 2-MF (b), recycled silica supported catalysts from cross-condensation of 2-MF and FUR (c), recycled silica supported catalysts from cross-condensation of 2-MF and n-butanol (d) and recycled silica supported catalysts from cross-condensation of 2-MF and 2-pentanone (e).

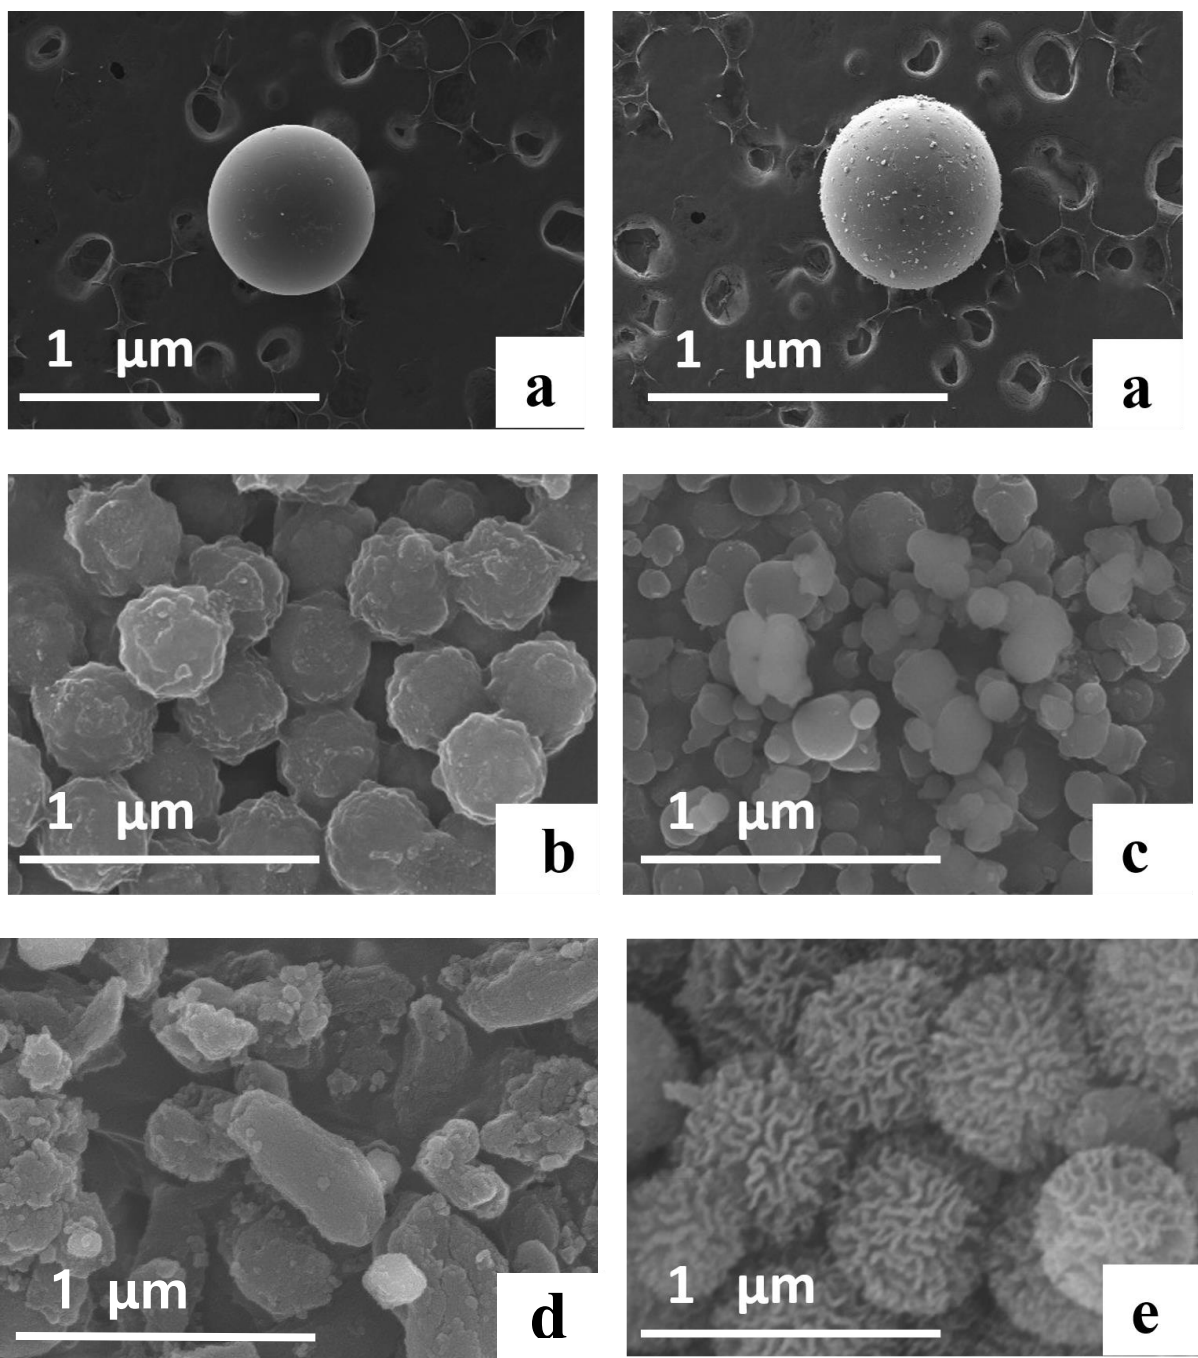

**Figure S15:** SEM images of Amberlyst-15 fresh and recycled (a), RNPSO<sub>3</sub>H (b), RMCM-41SO<sub>3</sub>H (c), RSBA-15SO<sub>3</sub>H (d), and RKCC-1 SO<sub>3</sub>H (e).

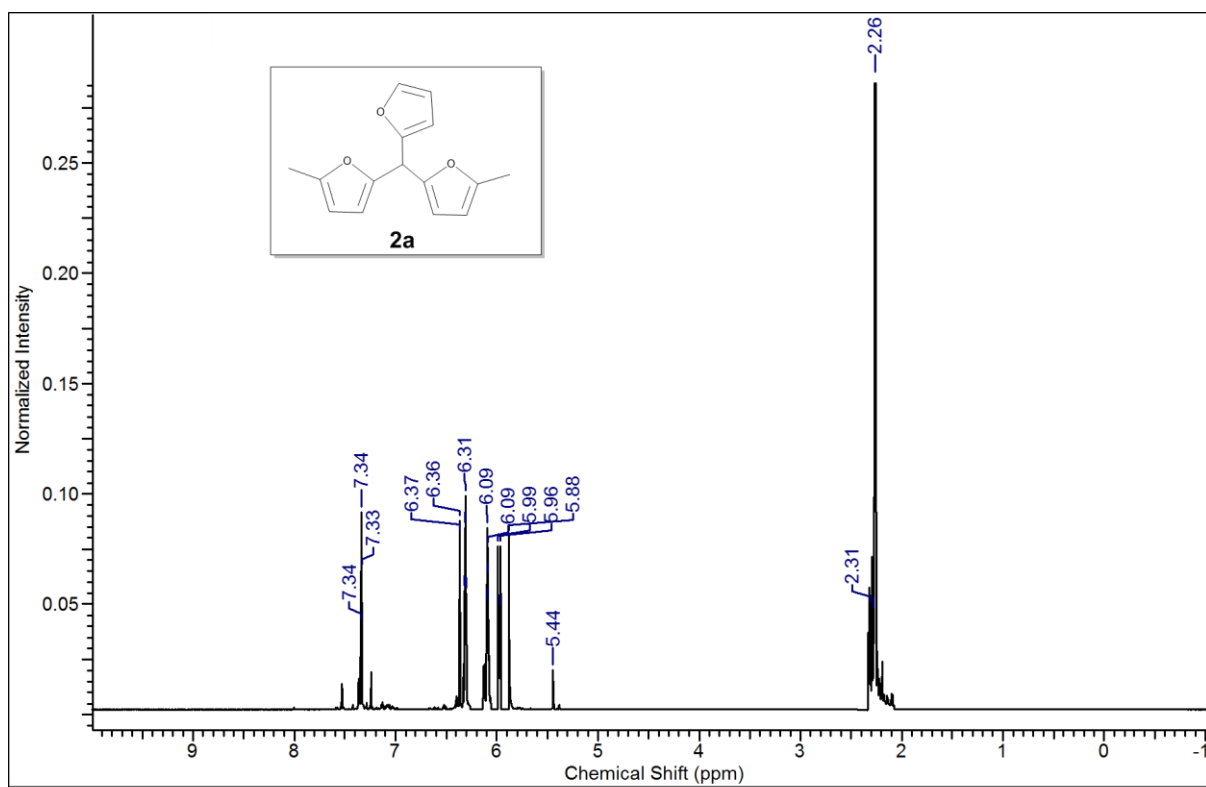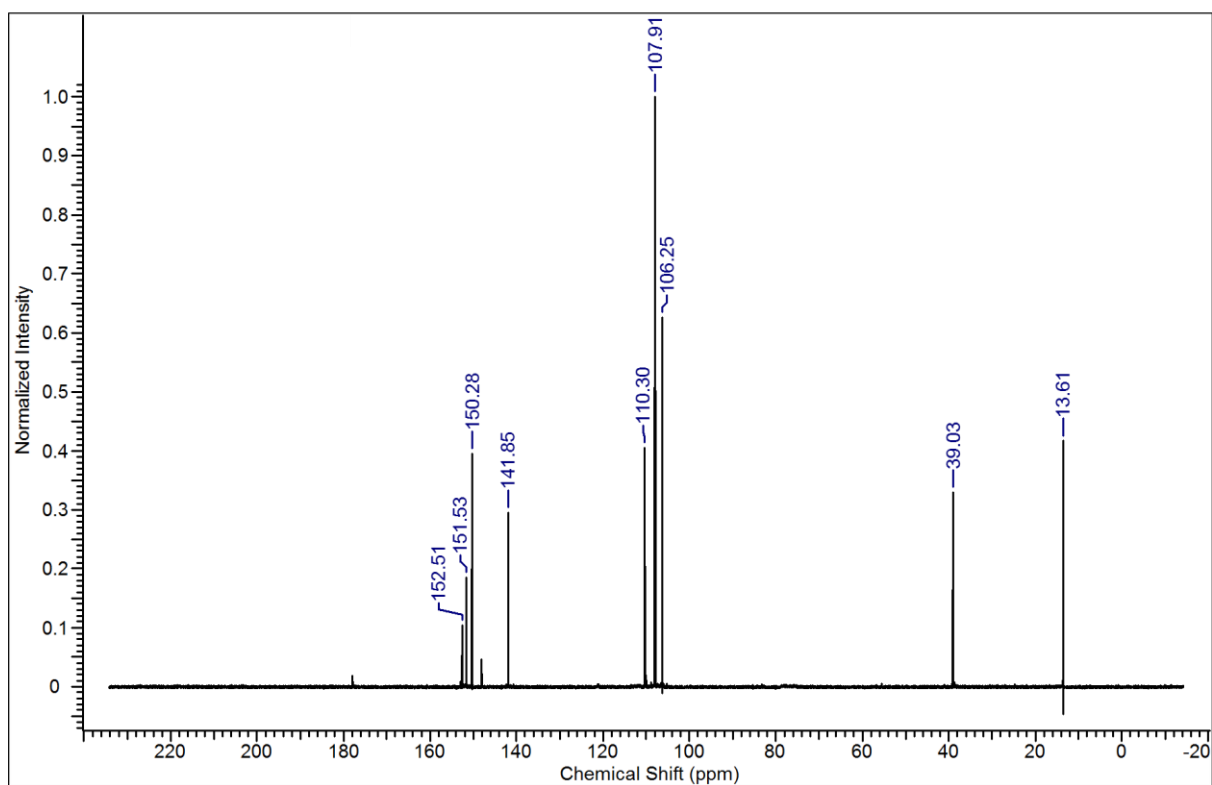

**Figure S16:** <sup>1</sup>H and <sup>13</sup>C NMR spectra of the **2a** produced by the cross -condensation of 2-MF and FUR.

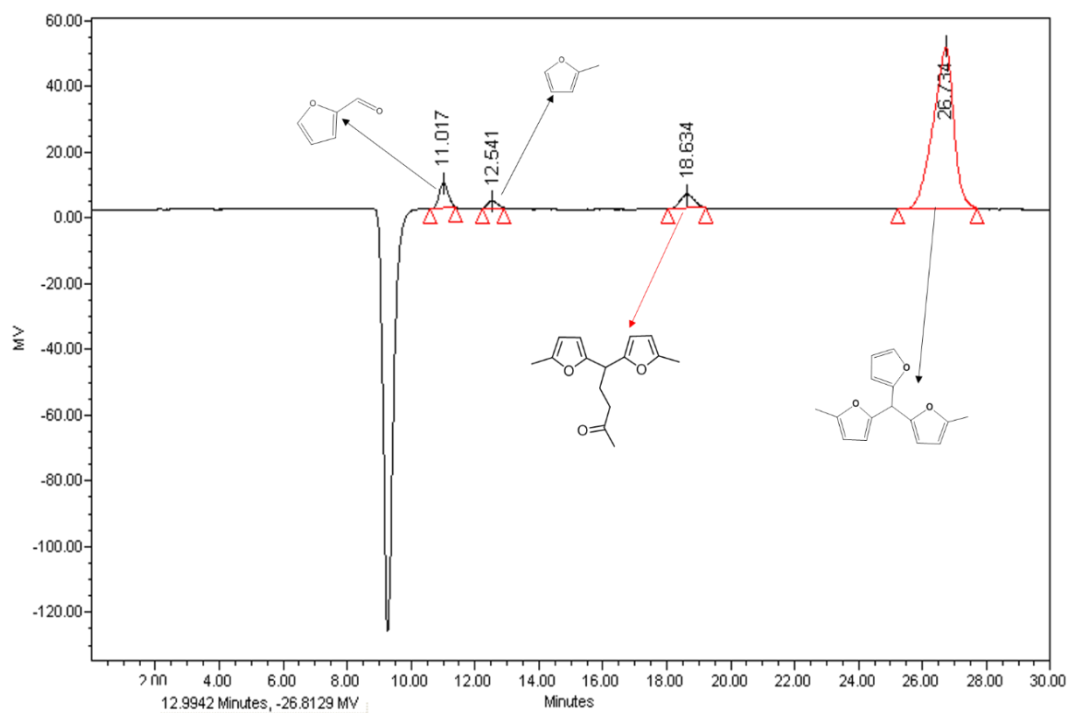

**Figure S17:** HPLC chromatogram of the liquid products from the cross-condensation of 2-MF and FUR

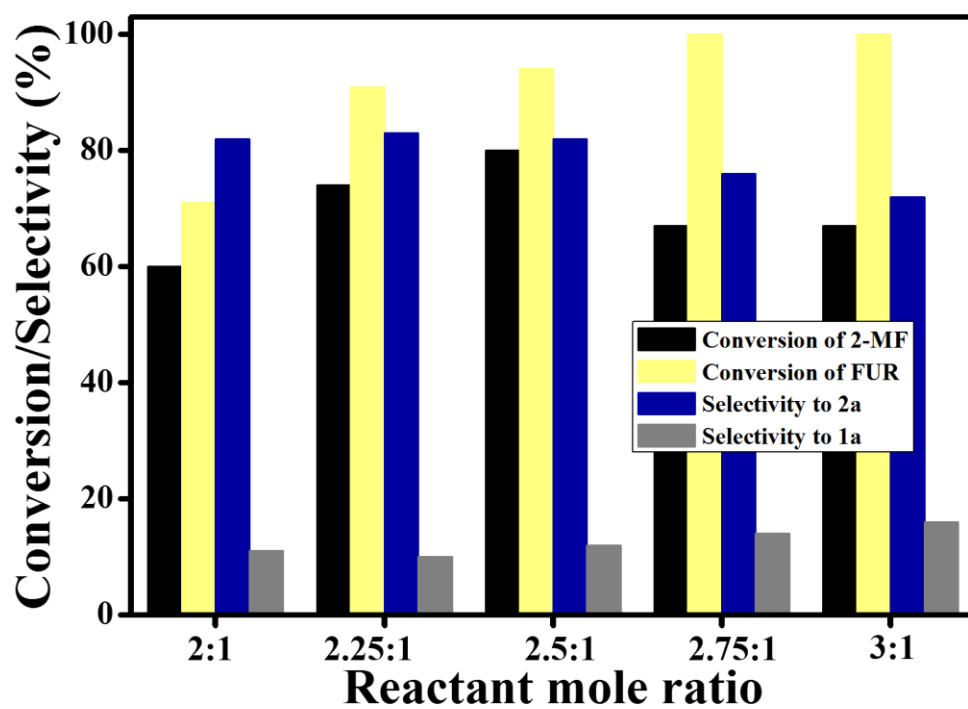

**Figure S18:** Result of the molar ratio study of the cross-condensation reaction of 2-MF and FUR using Amberlyst-15 catalysts for 2 h at 70 °C.

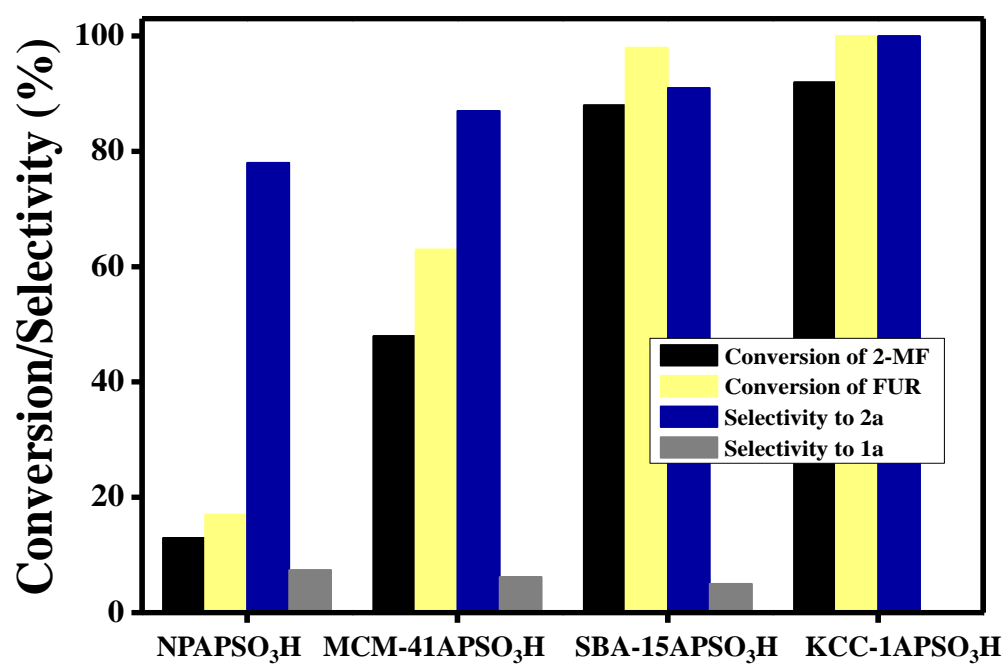

**Figure S19:** The effect of support morphology on conversion and selectivity. 2-MF (3.7 g), FUR (1.93 g) and catalyst (3 wt% by mass of 2-MF) were condensed for 2 h at 70 °C.

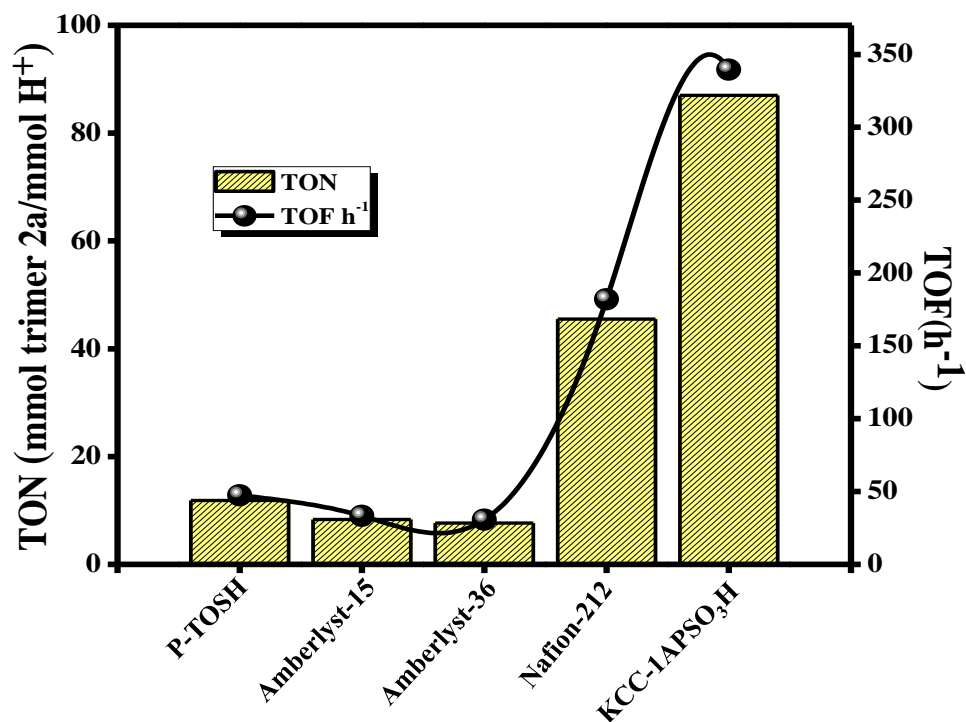

**Figure S20:** TON and TOF calculated from the yield after 0.25 h reaction. 2-MF (3.7 g), FUR (1.93 g) and catalyst (5 wt% by mass of 2-MF) were condensed for 2 h at 70 °C.

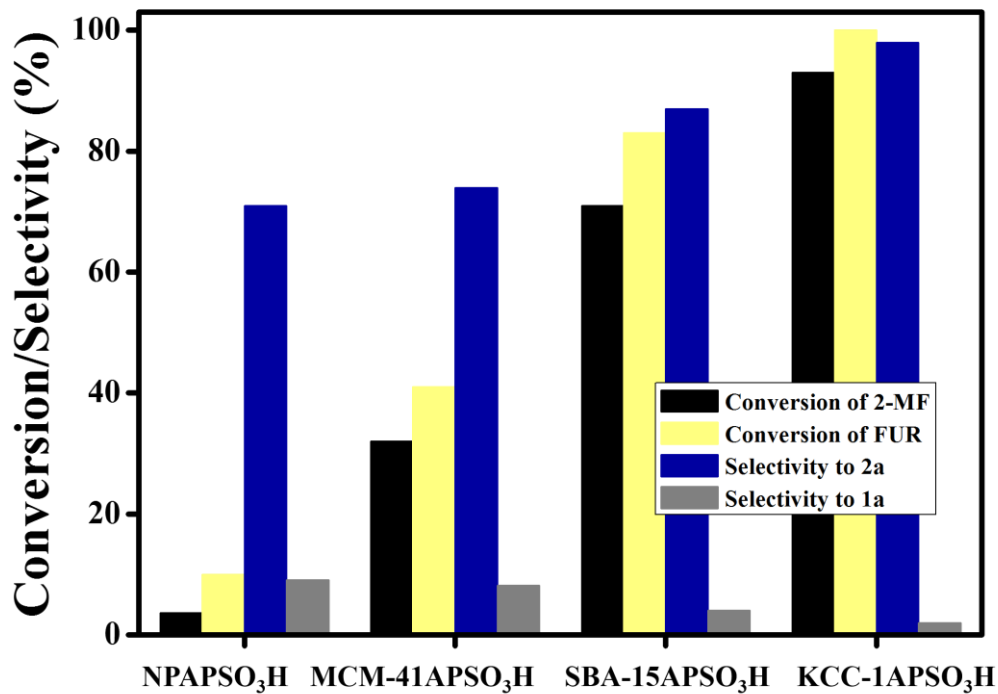

**Figure S21:** Result of the cross-condensation reaction of 2-MF and FUR using recycled NP, MCM-41, SBA-15 and KCC-1 supported catalysts. 2-MF (3.7 g), FUR (1.93 g) and catalyst (5 wt% by mass of 2-MF) were condensed for 2 h at 70 °C.

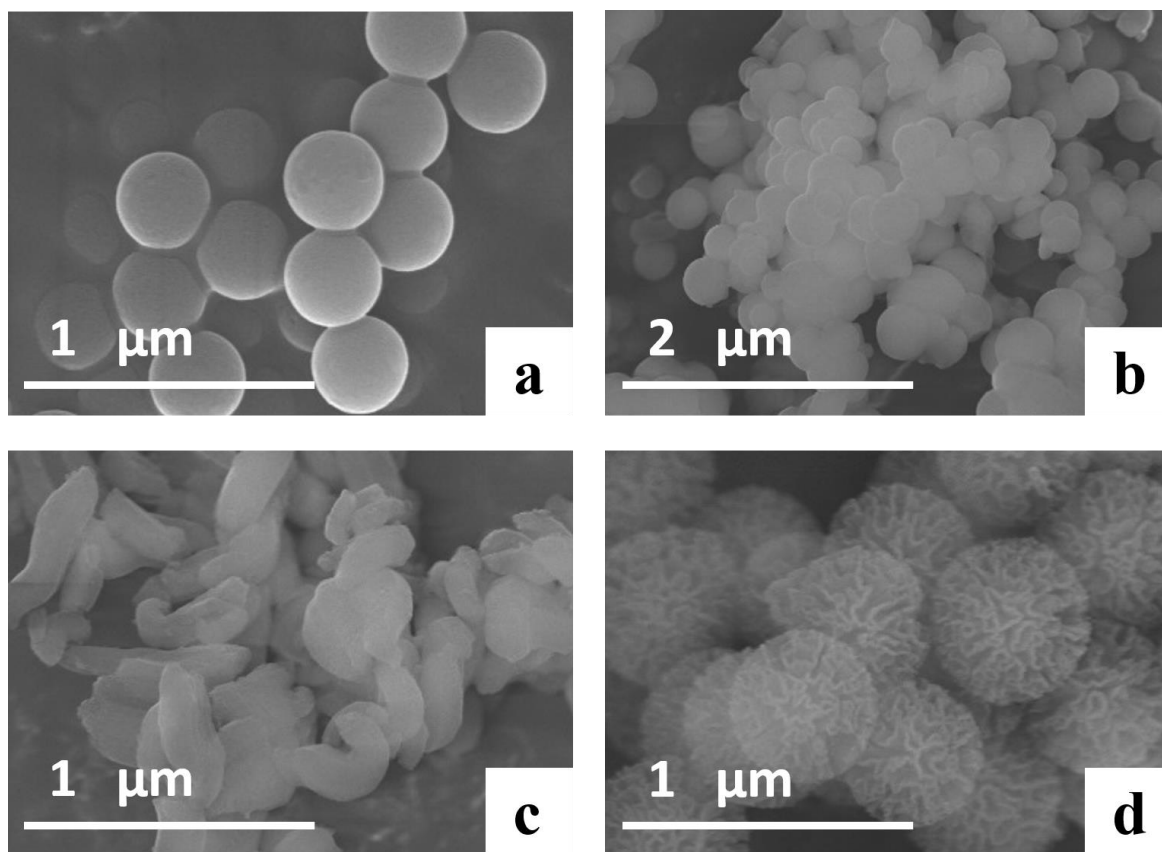

**Figure S22:** SEM images of recycled RNPAPSO<sub>3</sub>H (a), RMCM-41APSO<sub>3</sub>H (b), RSBA-15APSO<sub>3</sub>H (c), and RKCC-1 APSO<sub>3</sub>H (c).

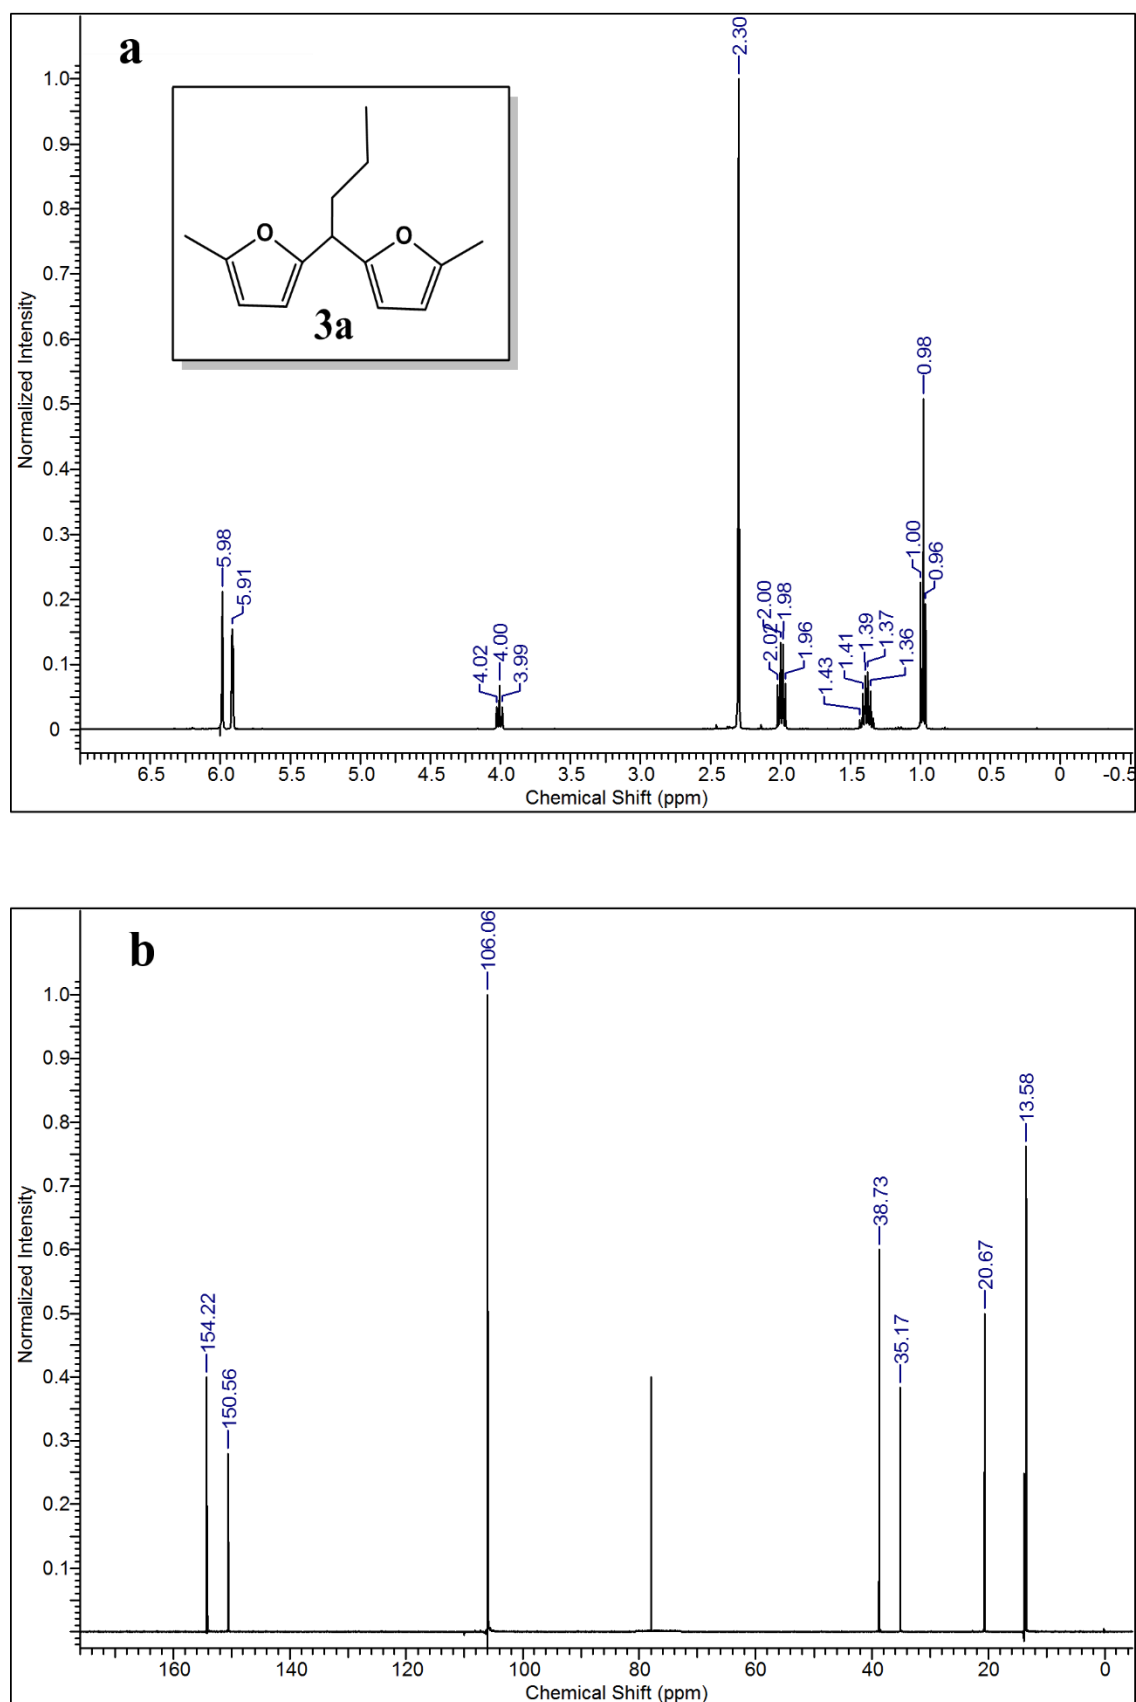

**Figure S 23:**  $^1\text{H}$  and  $^{13}\text{C}$  NMR spectra of the **3a** produced by the cross -condensation of 2-MF and n-butanal.

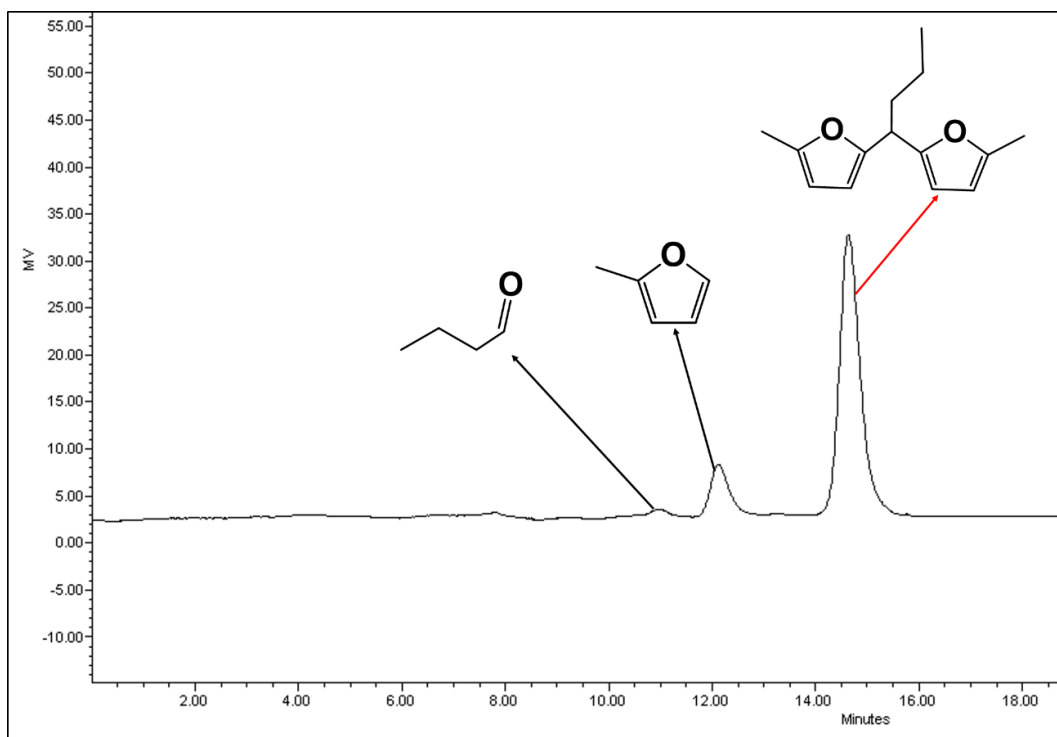

**Figure S24:** HPLC chromatogram of the liquid products from the cross-condensation of 2-MF and n-butanal.

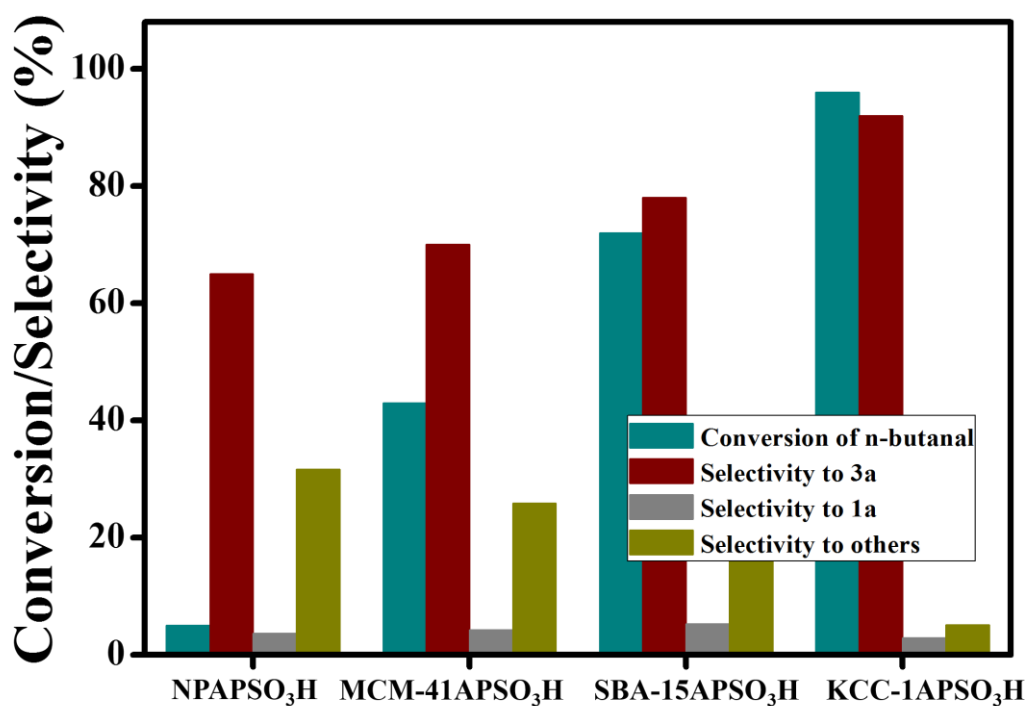

**Figure S25:** Result of the cross-condensation reaction of 2-MF and n-butanal using recycled NP, MCM-41, SBA-15 and KCC-1 supported catalysts. 2-MF (5 g), n-butanal (2.2 g) and catalyst (3 wt%) were condensed for 4 h at 50°C.

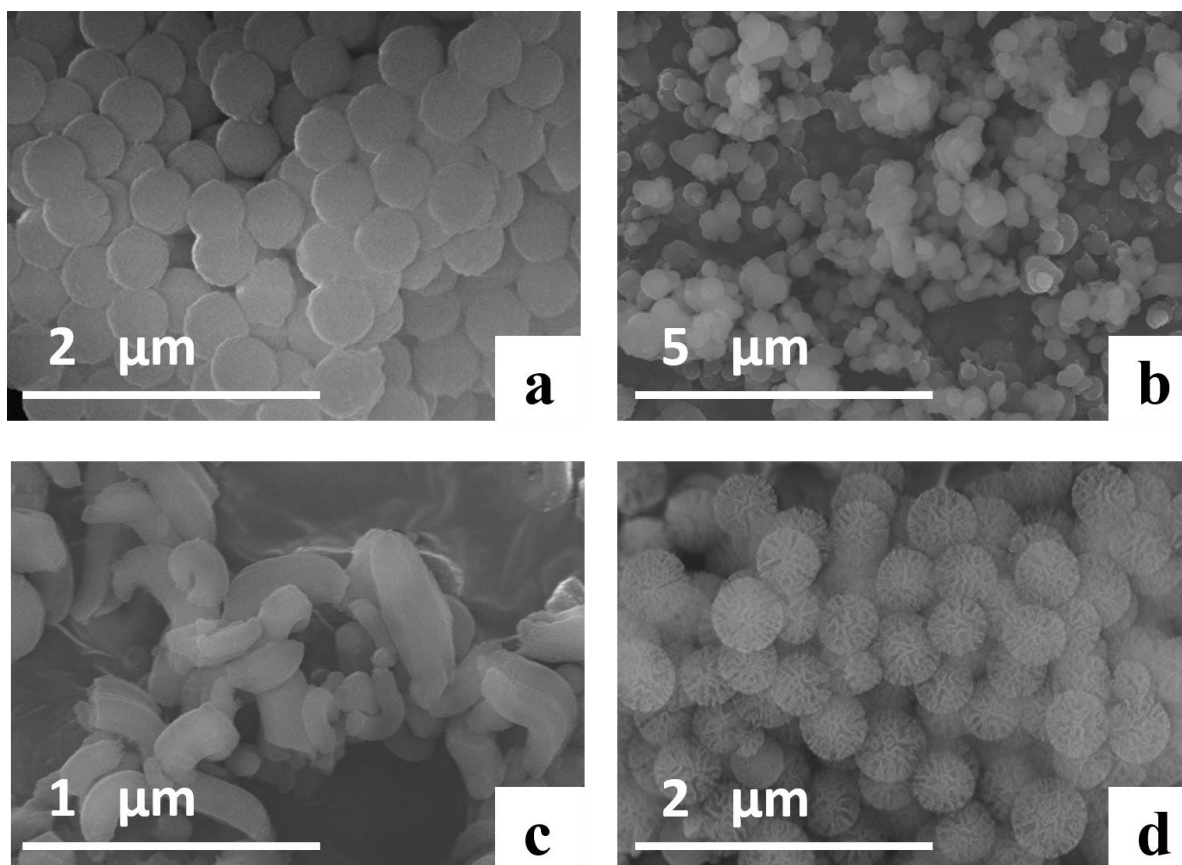

**Figure S26:** SEM images of recycled RNPAPSO<sub>3</sub>H (a), RMCM-41APSO<sub>3</sub>H (b), RSBA-15APSO<sub>3</sub>H (c), and RKCC-1 APSO<sub>3</sub>H (d).

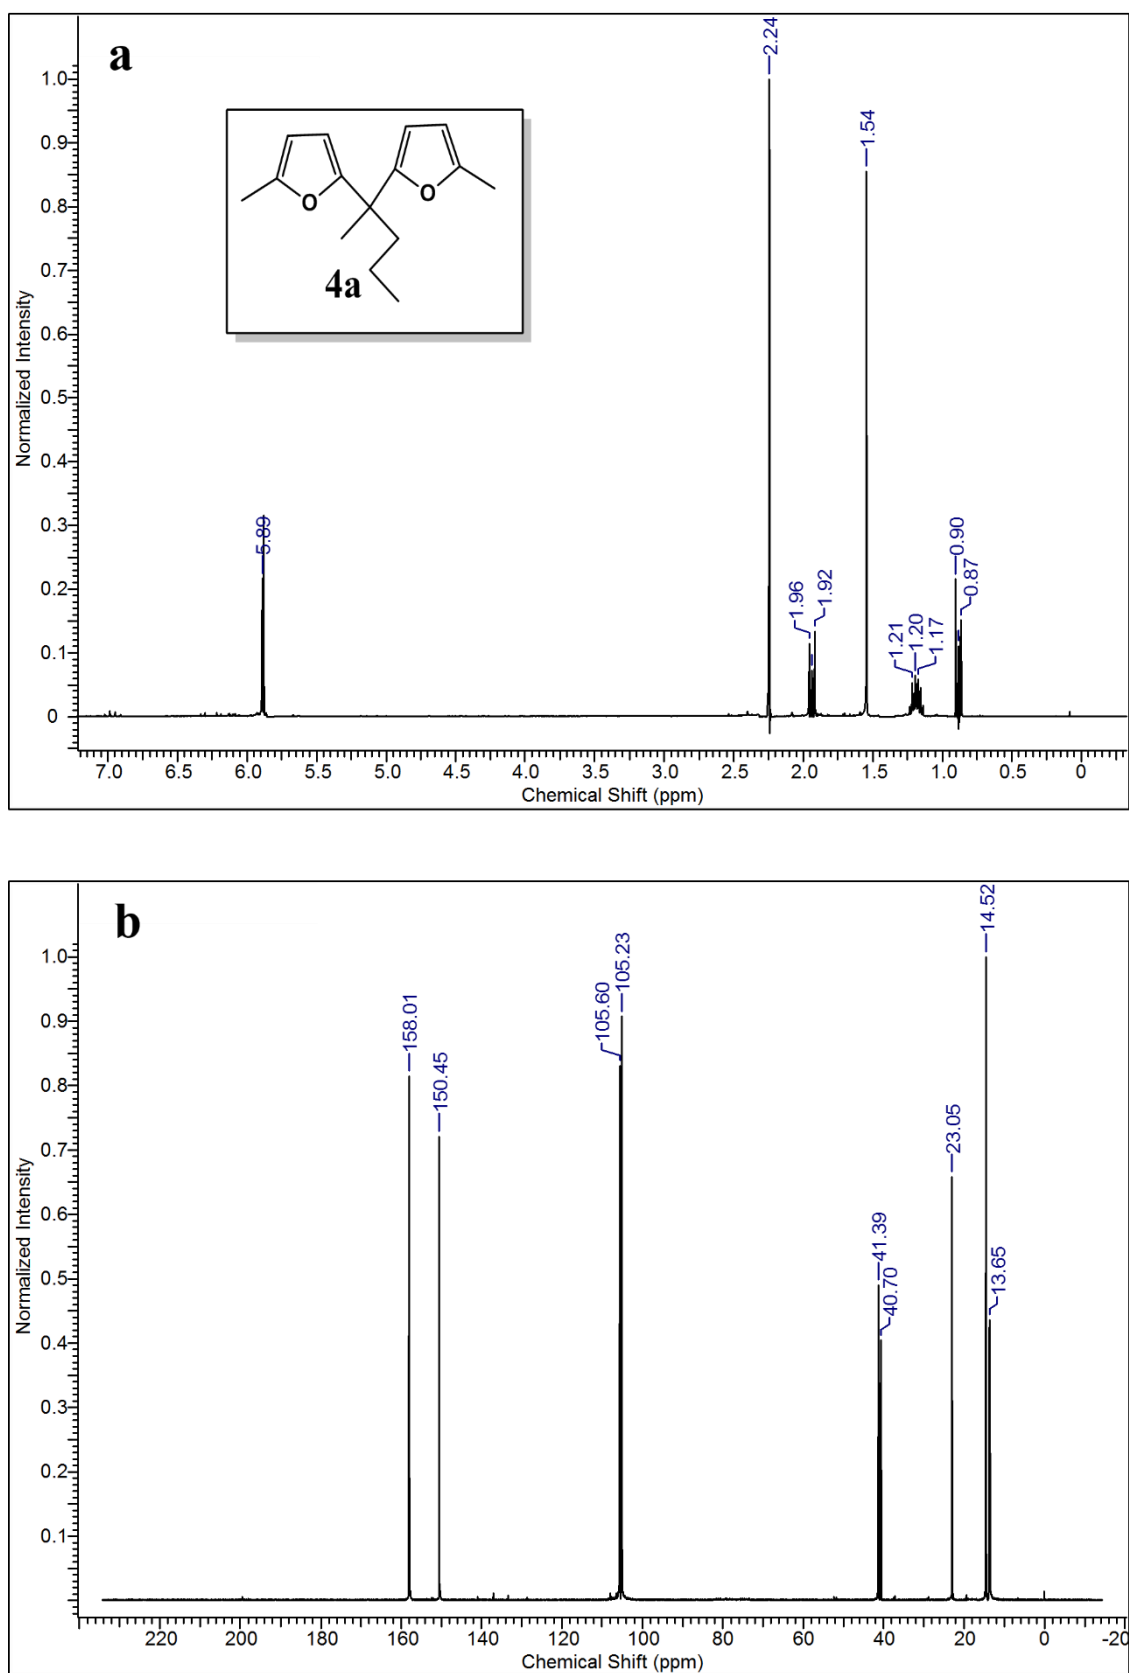

**Figure S27:**  $^1\text{H}$  and  $^{13}\text{C}$  NMR spectra of the 4a produced by the cross -condensation of 2-MF and 2-pentanone.

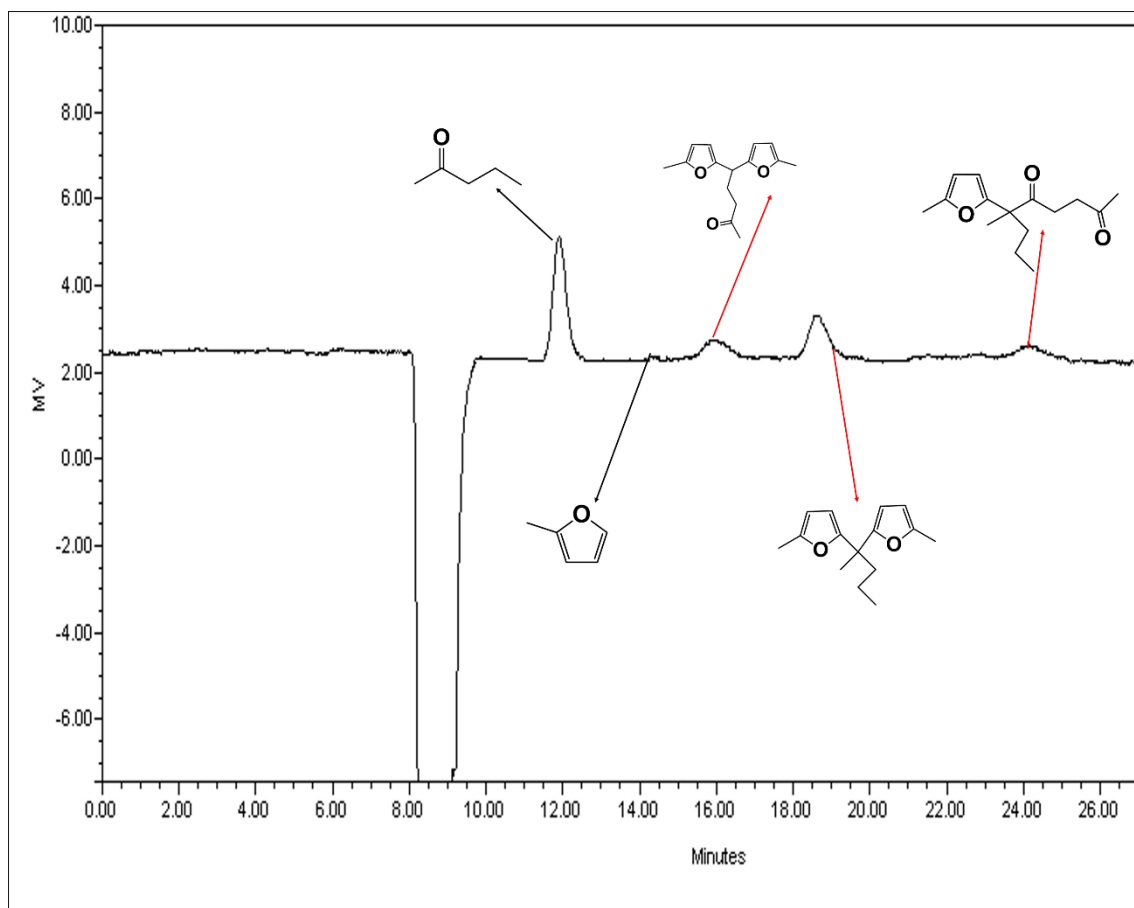

**Figure S28:** HPLC chromatogram of the liquid products from the cross-condensation of 2-MF and 2-pentanone.

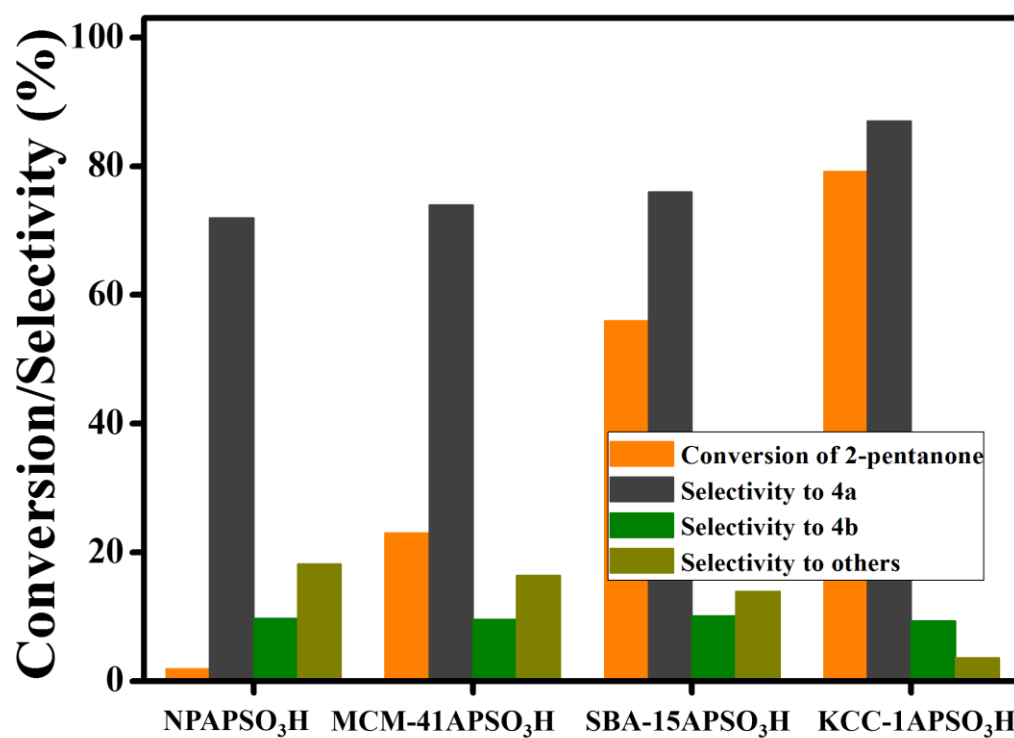

**Figure S29:** Result of the cross-condensation reaction of 2-MF and 2-pentanone using recycled NP, MCM-41, SBA-15 and KCC-1 supported catalysts. 2-MF (5 g), 2-pentanone (2.6 g) and catalyst (3 wt %) were condensed for 6 h at 85 °C.

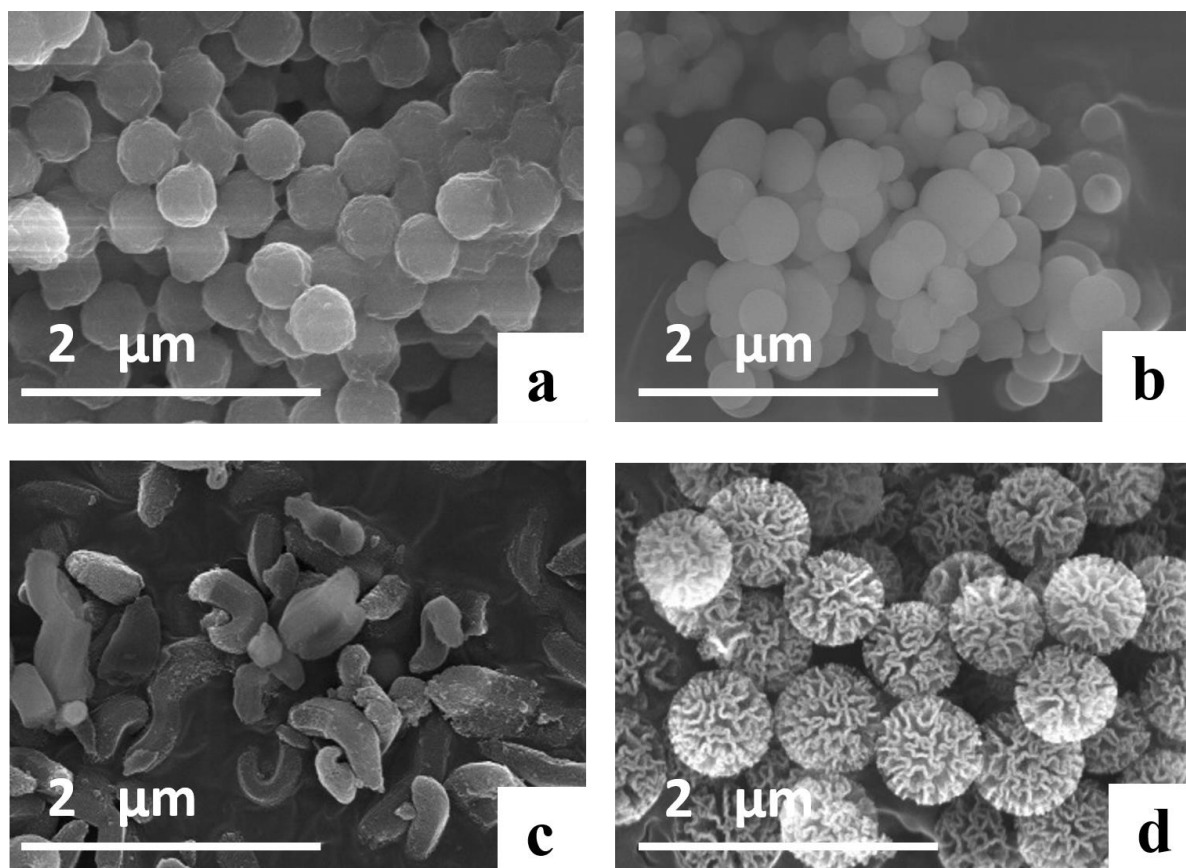

**Figure S30:** SEM images of recycled RNPAPSO<sub>3</sub>H (a), RMCM-41APSO<sub>3</sub>H (b), RSBA-15APSO<sub>3</sub>H (c), and RKCC-1 APSO<sub>3</sub>H (d).

**Table S3:** Comparison of the results acquired from this study with the previously reported values.

| Self-condensation reaction                                   |                                                     |                                                              |            |          |                  |                           |                          |              |
|--------------------------------------------------------------|-----------------------------------------------------|--------------------------------------------------------------|------------|----------|------------------|---------------------------|--------------------------|--------------|
| Entry                                                        | Catalyst                                            |                                                              | Temp. (°C) | Time (h) | Conversion (%)   | Selectivity 1a (%)        | Selectivity 1b (%)       | Ref.         |
| 1                                                            | 24 wt % H <sub>2</sub> SO <sub>4</sub>              |                                                              | 85         | 3        | 45               | 86.8                      | NA                       | <sup>1</sup> |
| 2                                                            | p-TosOH                                             |                                                              | 85         | 3        | 37               | NA                        | 83.1                     | <sup>1</sup> |
| 3                                                            | Amberlyst-15 with 15wt% H <sub>2</sub> O            |                                                              | 85         | 52       | 55.4             | 91                        | 3.2                      | <sup>1</sup> |
| 4                                                            | KCC-ISO <sub>3</sub> H with 10 wt% H <sub>2</sub> O |                                                              | 85         | 48       | 60               | 100                       | 0                        | This work    |
| Cross-condensation reaction of 2-methylfuran and furfural    |                                                     |                                                              |            |          |                  |                           |                          |              |
| Entry                                                        | Molar ratio                                         | Catalyst (Wt %)                                              | Temp. (°C) | Time (h) | Conversion (%)   | Yield /Selectivity 2a (%) | Yield/Selectivity 1a (%) | Ref.         |
| 1                                                            | 2:1                                                 | Nafion-212                                                   | 50         | 2        | 80 (FUR)         | 67 (yield)                | NA                       | <sup>2</sup> |
| 2                                                            | 2.2:1                                               | Silica-supported alkyl sulfonic acid-functionalized catalyst | 65         | 2        | 100 (FUR)        | 88.2 (yield)              | NA                       | <sup>3</sup> |
| 3                                                            | 2:1                                                 | Lignosulfonate-based acidic resin                            | 50         | 2        | 70.4 (2-MF)      | 65.4 (yield)              | NA                       | <sup>4</sup> |
| 4                                                            | 2:1                                                 | Pd/NbOPO <sub>4</sub>                                        | 80         | 5        | 92.3 (FUR)       | 89.7 (yield)              | 1.6                      | <sup>5</sup> |
| 5                                                            | 2.2:1                                               | Improved graphene oxide carbocatalyst                        | 60         | 3        | 100 (2-MF)       | 95 (yield)                | NA                       | <sup>6</sup> |
| 6                                                            | 2:1                                                 | KCC-1APSO <sub>3</sub> H                                     | 70         | 2        | 100 (FUR)        | 100 (selectivity)         | 0                        | This work    |
| NA- not available                                            |                                                     |                                                              |            |          |                  |                           |                          |              |
| Cross-condensation reaction of 2-methylfuran and n-butanal   |                                                     |                                                              |            |          |                  |                           |                          |              |
| Entry                                                        | Molar ratio                                         | Catalyst (Wt %)                                              | Temp. (°C) | Time (h) | Conversion (%)   | Yield/Selectivity 3a (%)  | Ref.                     |              |
| 1                                                            | 2:1                                                 | <i>para</i> -toluenesulfonic acid                            | 50         | 6        | 85 (n-Butanal)   | 91 (selectivity)          | <sup>7</sup>             |              |
| 2                                                            | 3:1                                                 |                                                              |            |          | 90 (n-Butanal)   | 93 (selectivity)          |                          |              |
| 3                                                            | 3.5:1                                               |                                                              |            |          | 93 (n-Butanal)   | 95 (selectivity)          |                          |              |
| 4                                                            | 2:1                                                 | Nafion-212                                                   | 50         | 4        | 96.6 (2-MF)      | 88.4 (yield)              | <sup>8</sup>             |              |
| 5                                                            | 2:1                                                 | Lignosulfonate-based acidic resin                            | 50         | 2        | 78 (2-MF)        | 76 (yield)                | <sup>4</sup>             |              |
| 6                                                            | 2:1                                                 | KCC-1APSO <sub>3</sub> H                                     | 50         | 4        | 100 of n-Butanal | 94 (selectivity)          | This work                |              |
| Cross-condensation reaction of 2-methylfuran and 2-pentanone |                                                     |                                                              |            |          |                  |                           |                          |              |
| Entry                                                        | Molar ratio                                         | Catalyst (Wt %)                                              | Temp. (°C) | Time (h) | Conversion (%)   | Selectivity 4a (%)        | Selectivity 1a (%)       | Ref.         |
| 1                                                            | 2.5:1                                               | p-TosOH (3.8)                                                | 60         | 22.5     | 63 (2-pentanone) | 76                        | 11                       | <sup>7</sup> |
| 2                                                            | 2.5:1                                               | p-TosOH (2.6)                                                | 100        | 3        | 76 (2-pentanone) | 67                        | 15                       |              |
| 3                                                            | 2.5:1                                               | H <sub>2</sub> SO <sub>4</sub> (22.4)                        | 60         | 9.5      | 61 (2-pentanone) | 22                        | 46                       |              |
| 4                                                            | 3:1                                                 | H <sub>2</sub> SO <sub>4</sub> (22.4)                        | 100        | 1        | 71 (2-pentanone) | 14                        | 55                       |              |
| 5                                                            | 2.5:1                                               | KCC-1APSO <sub>3</sub> H                                     | 85         | 6        | 89 (2-pentanone) | 82                        | 10.2                     | This work    |

- 1 I. Yati, M. Yeom, J. W. Choi, H. Choo, D. J. Suh and J. M. Ha, *Appl. Catal. A Gen.*, , DOI:10.1016/j.apcata.2015.02.002.
- 2 G. Li, N. Li, Z. Wang, C. Li, A. Wang, X. Wang, Y. Cong and T. Zhang, *ChemSusChem*, 2012, **5**, 1958–1966.
- 3 M. Balakrishnan, E. R. Sacia and A. T. Bell, *ChemSusChem*, 2014, **7**, 1078–1085.
- 4 S. Li, N. Li, G. Li, L. Li, A. Wang, Y. Cong, X. Wang and T. Zhang, *Green Chem.*, , DOI:10.1039/C5GC00372E.
- 5 Q. Xia, Y. Xia, J. Xi, X. Liu, Y. Zhang, Y. Guo and Y. Wang, *ChemSusChem*, 2017, **10**, 747–753.
- 6 S. Dutta, A. Bohre, W. Zheng, G. R. Jenness, M. Núñez, B. Saha and D. G. Vlachos, *ACS Catal.*, 2017, **7**, 3905–3915.
- 7 A. Corma, O. de la Torre and M. Renz, *Energy Environ. Sci.*, , DOI:10.1039/c2ee02778j.
- 8 G. Li, N. Li, J. Yang, A. Wang, X. Wang, Y. Cong and T. Zhang, *Bioresour. Technol.*, , DOI:10.1016/j.biortech.2013.01.116.
